# Supplementary material for: New pentacyclic triterpenoids isolated from Leptopus chinensis and their hepatoprotective activities on tert-butyl hydroperoxide-induced oxidative injury
Source: Royal Society of Chemistry journal article supplement (doi:10.1039/d1ra00962a), 2021-01-01
Supplement: d1ra00962a1.pdf [file d1ra00962a1.pdf]

## Electronic Supplementary Information

### **New pentacyclic triterpenoids isolated from *Leptopus chinensis* and their hepatoprotective activities on *tert*-butyl hydroperoxide-induced oxidative injury**

Liping Long,<sup>a,b</sup> Ye Yang,<sup>a,b</sup> Tianliang Zhu,<sup>a,b</sup> Xinxin Zhang,<sup>a,b</sup> Shizhou Qi,<sup>a,b</sup> Ting Liu,<sup>a,b</sup> Kairu Song,<sup>a,b</sup> Da Wang,<sup>\*,c</sup> and Huiyuan Gao,<sup>\*,a,b</sup>

<sup>a</sup> *School of Traditional Chinese Materia Medica, Shenyang Pharmaceutical University, Shenyang 110016, People's Republic of China*

<sup>b</sup> *Key Laboratory of Structure-Based Drug Design & Discovery of Ministry of Education, Shenyang Pharmaceutical University, Shenyang 110016, People's Republic of China*

<sup>c</sup> *School of Pharmacy, Shenyang Pharmaceutical University, Shenyang 110016, People's Republic of China*

\*Corresponding author:

E-mail: [sypugaohy@163.com](mailto:sypugaohy@163.com) (H. Gao);

[123wd123@163.com](mailto:123wd123@163.com) (D. Wang)

## Contents

- Figure S1 HRESIMS spectrum of compound **1**.  
Figure S2 UV spectrum of compound **1**.  
Figure S3 IR spectrum of compound **1**.  
Figure S4  $^1\text{H}$ -NMR spectrum of compound **1** in  $\text{DMSO-}d_6$ . (600 MHz)  
Figure S5  $^{13}\text{C}$ -NMR spectrum of compound **1** in  $\text{DMSO-}d_6$ . (150 MHz)  
Figure S6 HSQC spectrum of compound **1**.  
Figure S7 HMBC spectrum of compound **1**.  
Figure S8 NOESY spectrum of compound **1**.  
Figure S9 HRESIMS spectrum of compound **2**.  
Figure S10 UV spectrum of compound **2**.  
Figure S11 IR spectrum of compound **2**.  
Figure S12  $^1\text{H}$ -NMR spectrum of compound **2** in  $\text{DMSO-}d_6$ . (600 MHz)  
Figure S13  $^{13}\text{C}$ -NMR spectrum of compound **2** in  $\text{DMSO-}d_6$ . (150 MHz)  
Figure S14 HSQC spectrum of compound **2**.  
Figure S15 HMBC spectrum of compound **2**.  
Figure S16 NOESY spectrum of compound **2**.  
Figure S17 HRESIMS spectrum of compound **3**.  
Figure S18 UV spectrum of compound **3**.  
Figure S19 IR spectrum of compound **3**.  
Figure S20  $^1\text{H}$ -NMR spectrum of compound **3** in  $\text{CDCl}_3$ . (600 MHz)  
Figure S21  $^{13}\text{C}$ -NMR spectrum of compound **3** in  $\text{CDCl}_3$ . (150 MHz)  
Figure S22 HSQC spectrum of compound **3**.  
Figure S23 HMBC spectrum of compound **3**.  
Figure S24 NOESY spectrum of compound **3**.  
Figure S25 HRESIMS spectrum of compound **4**.  
Figure S26 UV spectrum of compound **4**.  
Figure S27  $^1\text{H}$ -NMR spectrum of compound **4** in  $\text{DMSO-}d_6$ . (600 MHz)  
Figure S28  $^{13}\text{C}$ -NMR spectrum of compound **4** in  $\text{DMSO-}d_6$ . (150 MHz)  
Figure S29 HSQC spectrum of compound **4**.  
Figure S30 HMBC spectrum of compound **4**.  
Figure S31 NOESY spectrum of compound **4**.  
Figure S32 HRESIMS spectrum of compound **8**.  
Figure S33 UV spectrum of compound **8**.  
Figure S34 IR spectrum of compound **8**.  
Figure S35  $^1\text{H}$ -NMR spectrum of compound **8** in  $\text{DMSO-}d_6$ . (600 MHz)  
Figure S36  $^{13}\text{C}$ -NMR spectrum of compound **8** in  $\text{DMSO-}d_6$ . (150 MHz)  
Figure S37 HSQC spectrum of compound **8**.  
Figure S38 HMBC spectrum of compound **8**.  
Figure S39 NOESY spectrum of compound **8**.  
Figure S40 HRESIMS spectrum of compound **9**.  
Figure S41 UV spectrum of compound **9**.  
Figure S42 IR spectrum of compound **9**.  
Figure S43  $^1\text{H}$ -NMR spectrum of compound **9** in  $\text{DMSO-}d_6$ . (600 MHz)

Figure S44  $^{13}\text{C}$ -NMR spectrum of compound **9** in  $\text{DMSO-}d_6$ . (150 MHz)  
Figure S45 HSQC spectrum of compound **9**.  
Figure S46 HMBC spectrum of compound **9**.  
Figure S47 NOESY spectrum of compound **9**.  
Figure S48 HRESIMS spectrum of compound **10**.  
Figure S49 UV spectrum of compound **10**.  
Figure S50  $^1\text{H}$ -NMR spectrum of compound **10** in  $\text{DMSO-}d_6$ . (600 MHz)  
Figure S51  $^{13}\text{C}$ -NMR spectrum of compound **10** in  $\text{DMSO-}d_6$ . (150 MHz)  
Figure S52 HSQC spectrum of compound **10**.  
Figure S53 HMBC spectrum of compound **10**.  
Figure S54 NOESY spectrum of compound **10**.  
Figure S55 HRESIMS spectrum of compound **11**.  
Figure S56 UV spectrum of compound **11**.  
Figure S57  $^1\text{H}$ -NMR spectrum of compound **11** in  $\text{DMSO-}d_6$ . (600 MHz)  
Figure S58  $^{13}\text{C}$ -NMR spectrum of compound **11** in  $\text{DMSO-}d_6$ . (150 MHz)  
Figure S59 HSQC spectrum of compound **11**.  
Figure S60 HMBC spectrum of compound **11**.  
Figure S61 NOESY spectrum of compound **11**.

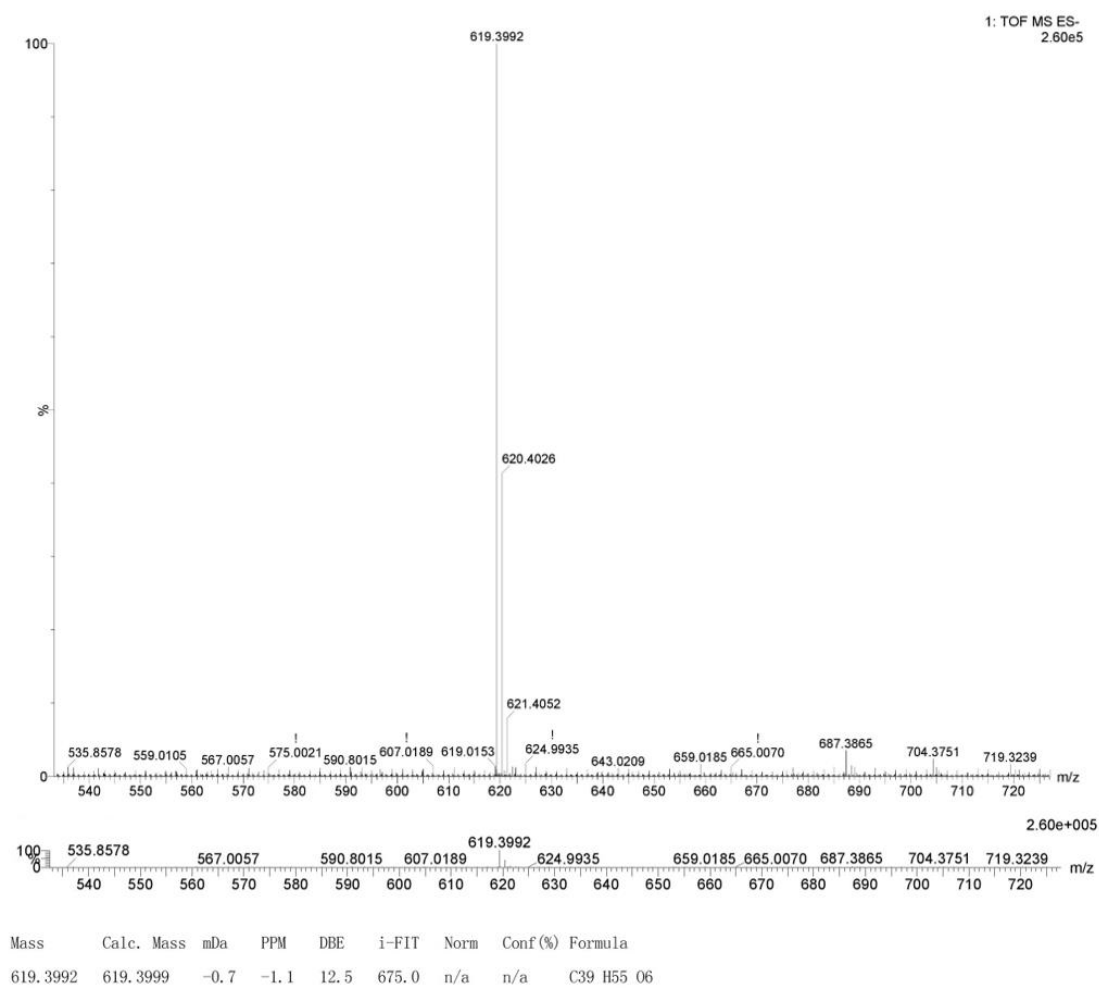

Figure S1 The HRESIMS spectrum of compound **1**.

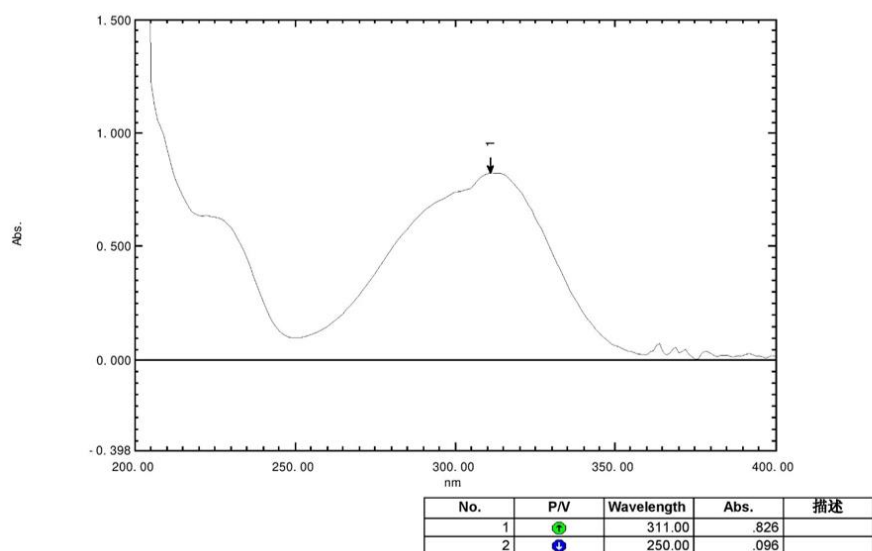

Figure S2 The UV spectrum of compound **1**.

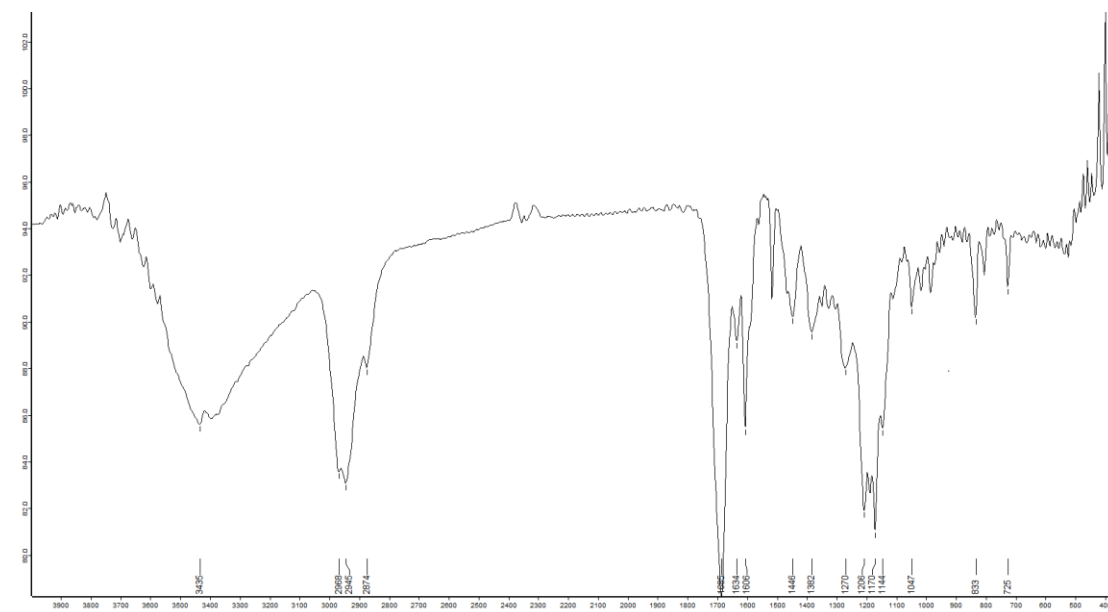

Figure S3 The IR spectrum of compound **1**.

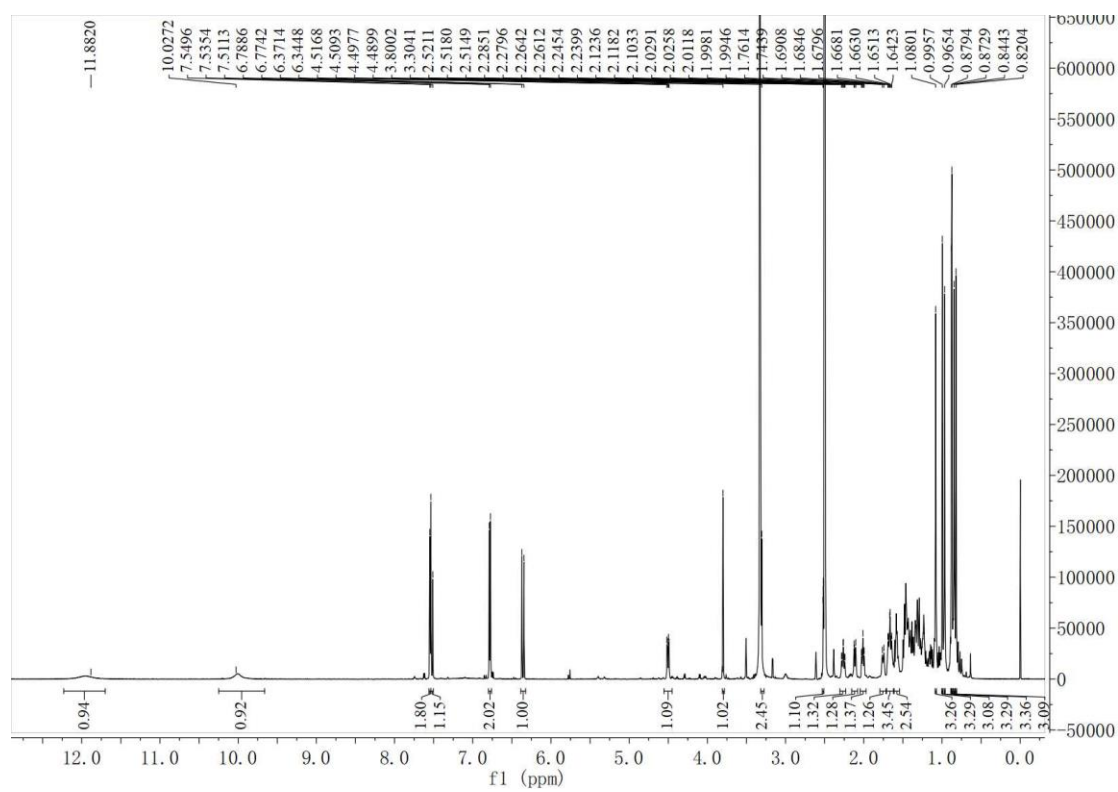

Figure S4 The  $^1\text{H}$ -NMR spectrum of compound **1**.

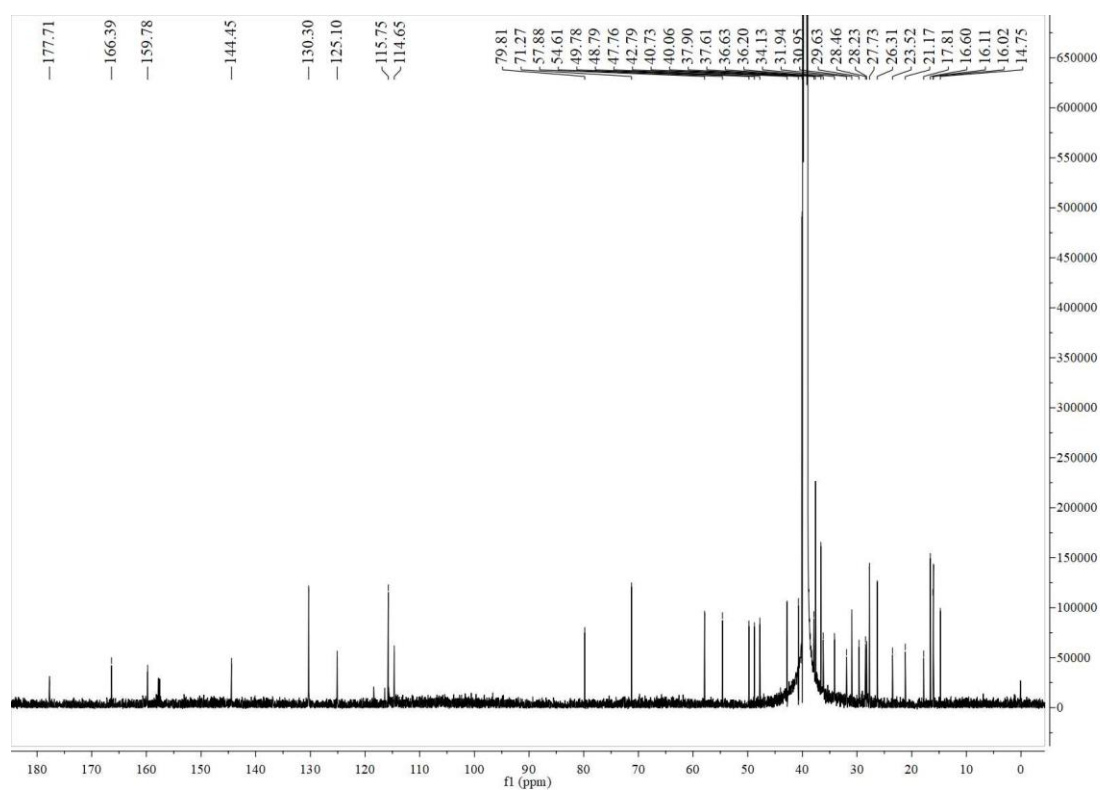

Figure S5 The  $^{13}\text{C}$ -NMR spectrum of compound **1**.

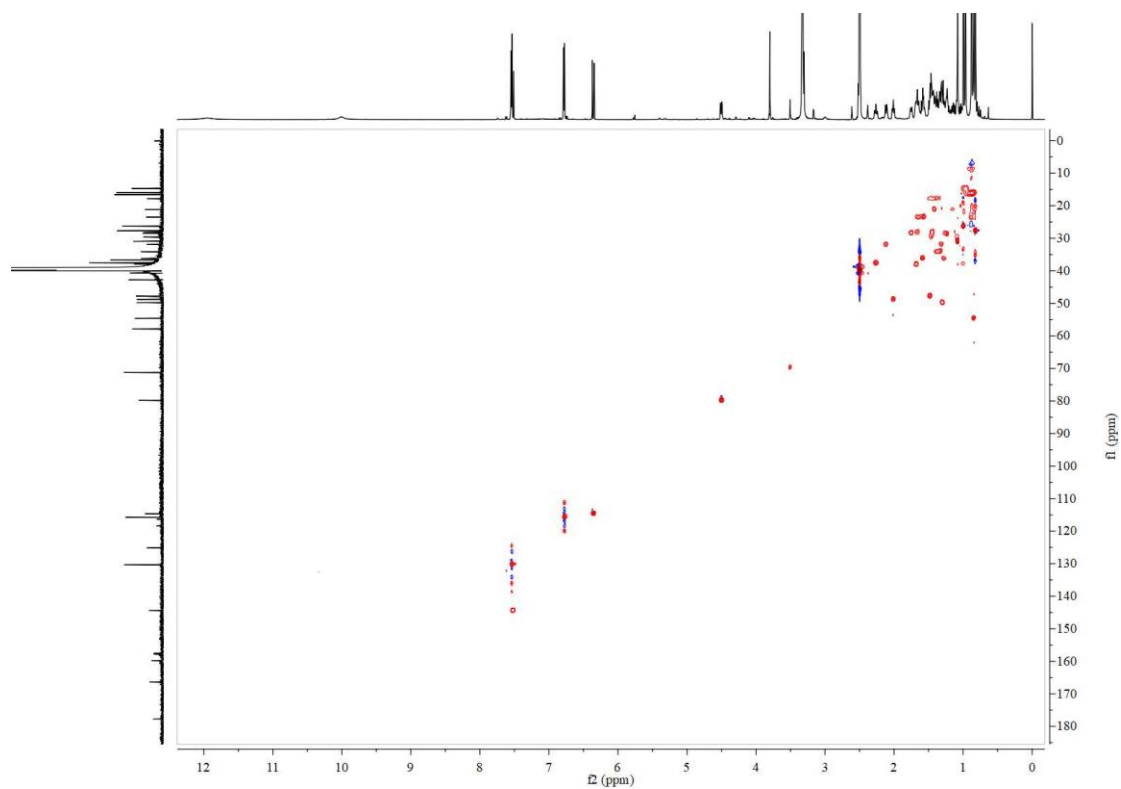

Figure S6 The HSQC spectrum of compound **1**.

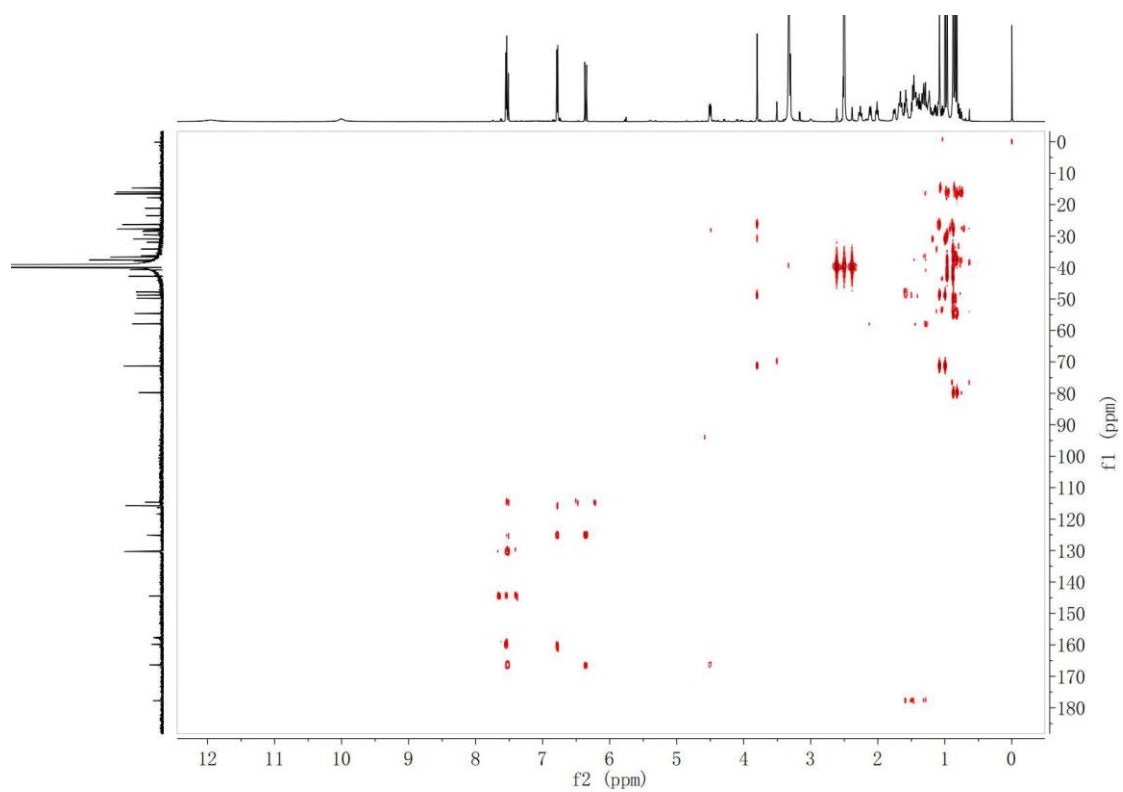

Figure S7 The HMBC spectrum of compound **1**.

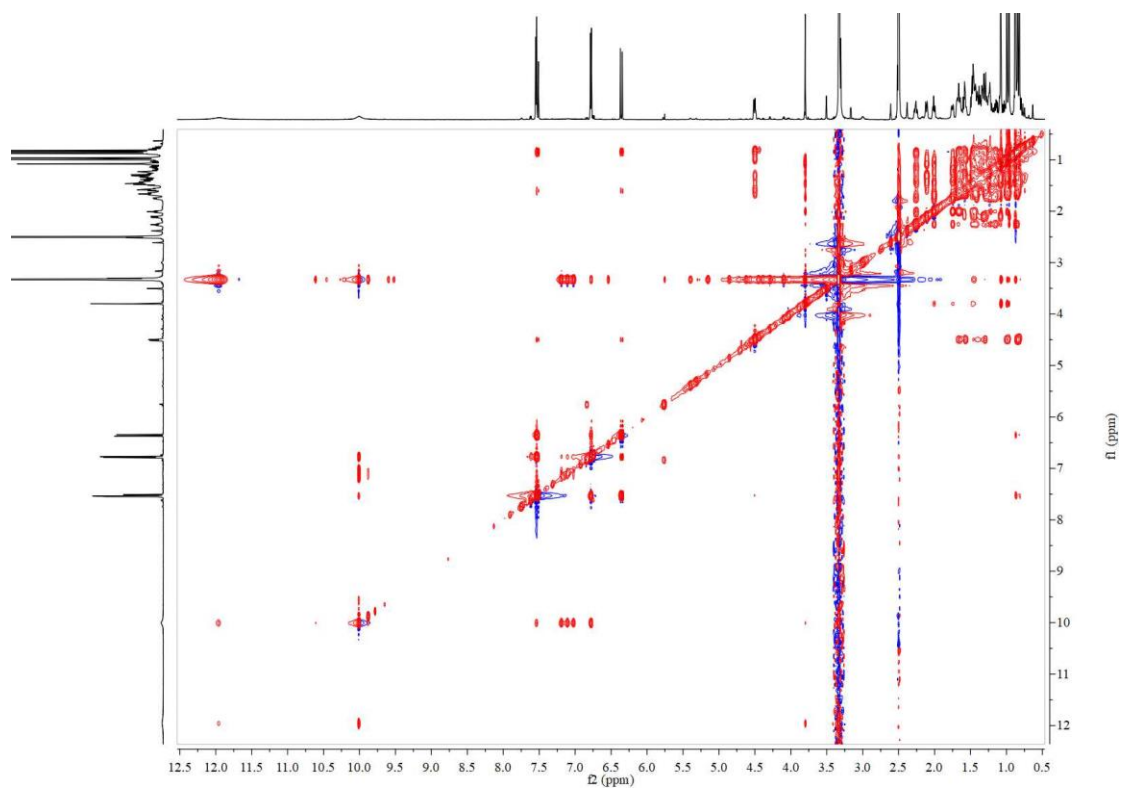

Figure S8 The NOESY spectrum of compound **1**.

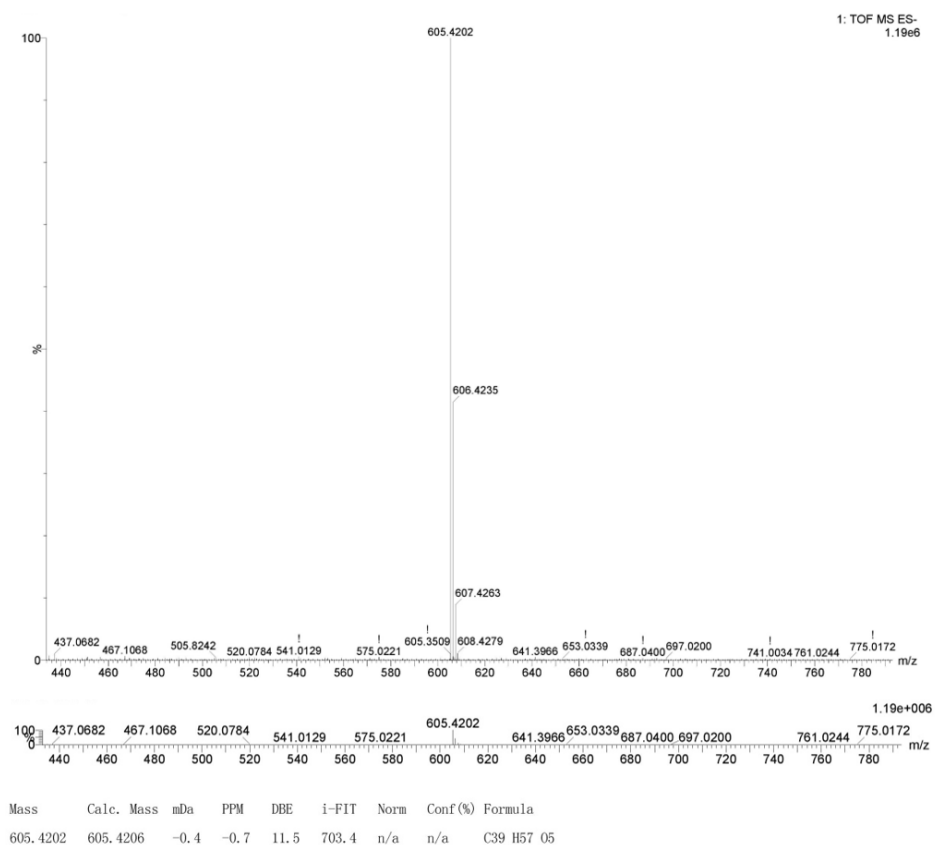

Figure S9 The HRESIMS spectrum of compound **2**.

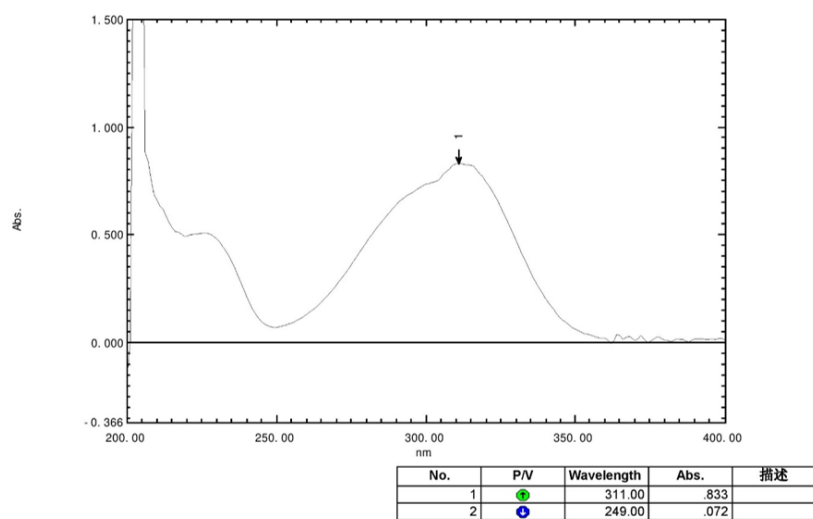

Figure S10 The UV spectrum of compound **2**.



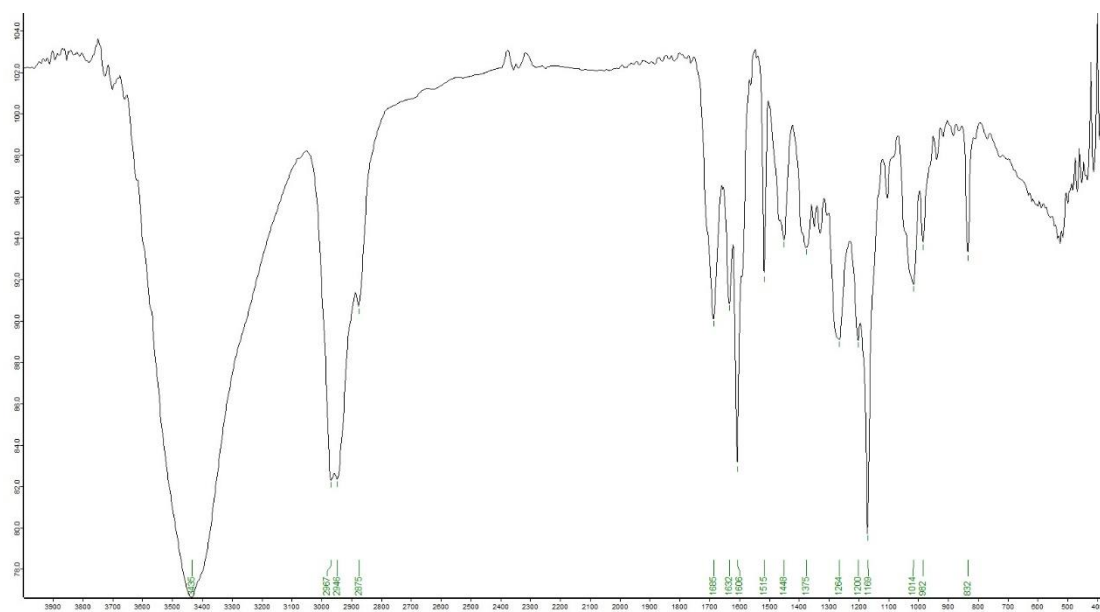

Figure S11 The IR spectrum of compound **2**.

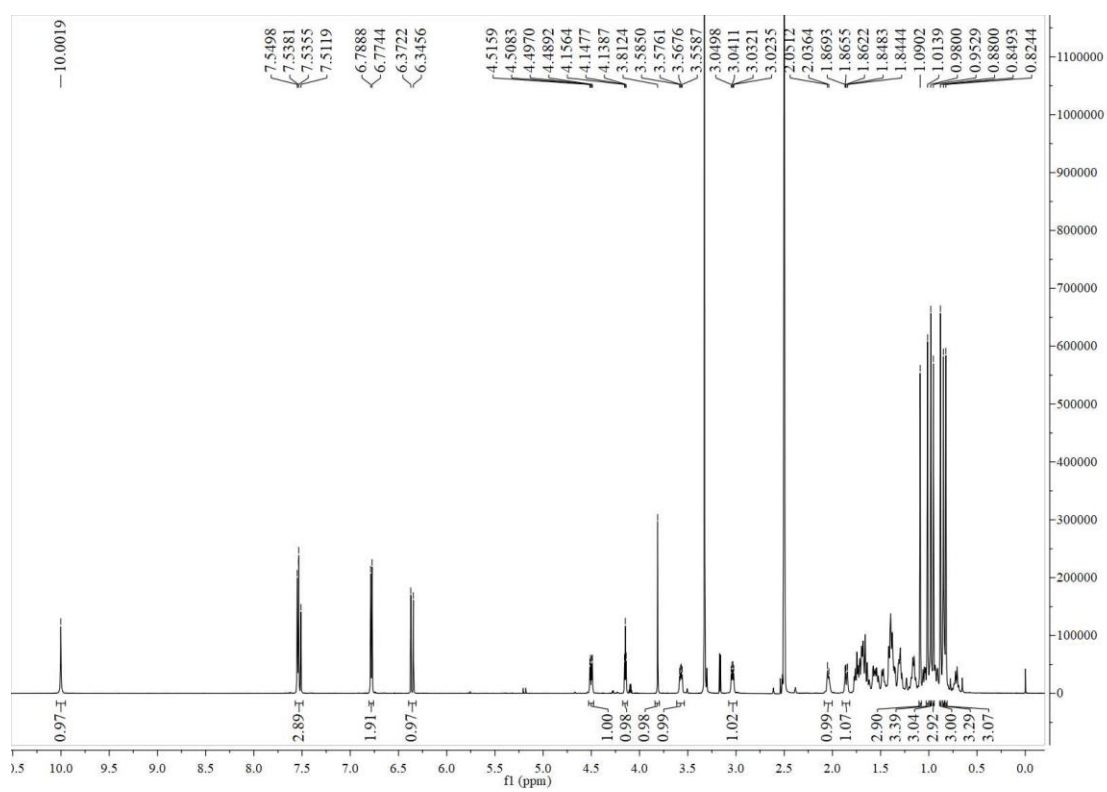

Figure S12 The  $^1\text{H}$ -NMR spectrum of compound **2**.

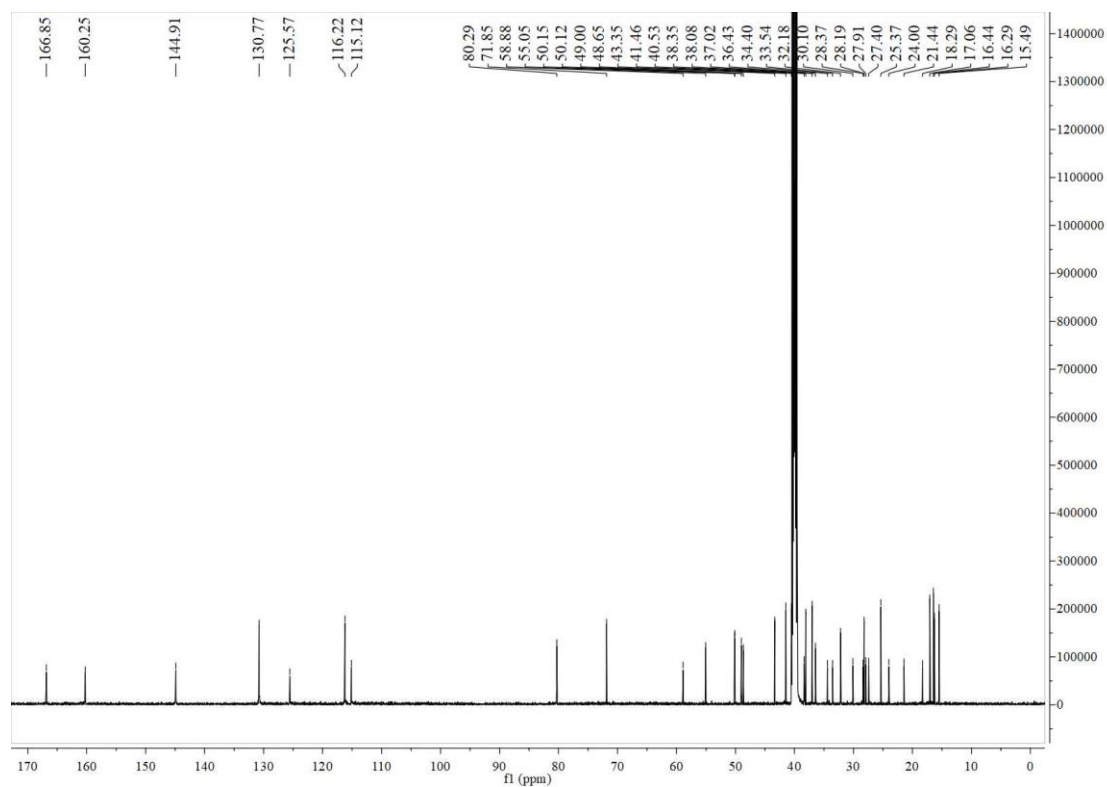

Figure S13 The  $^{13}\text{C}$ -NMR spectrum of compound **2**.

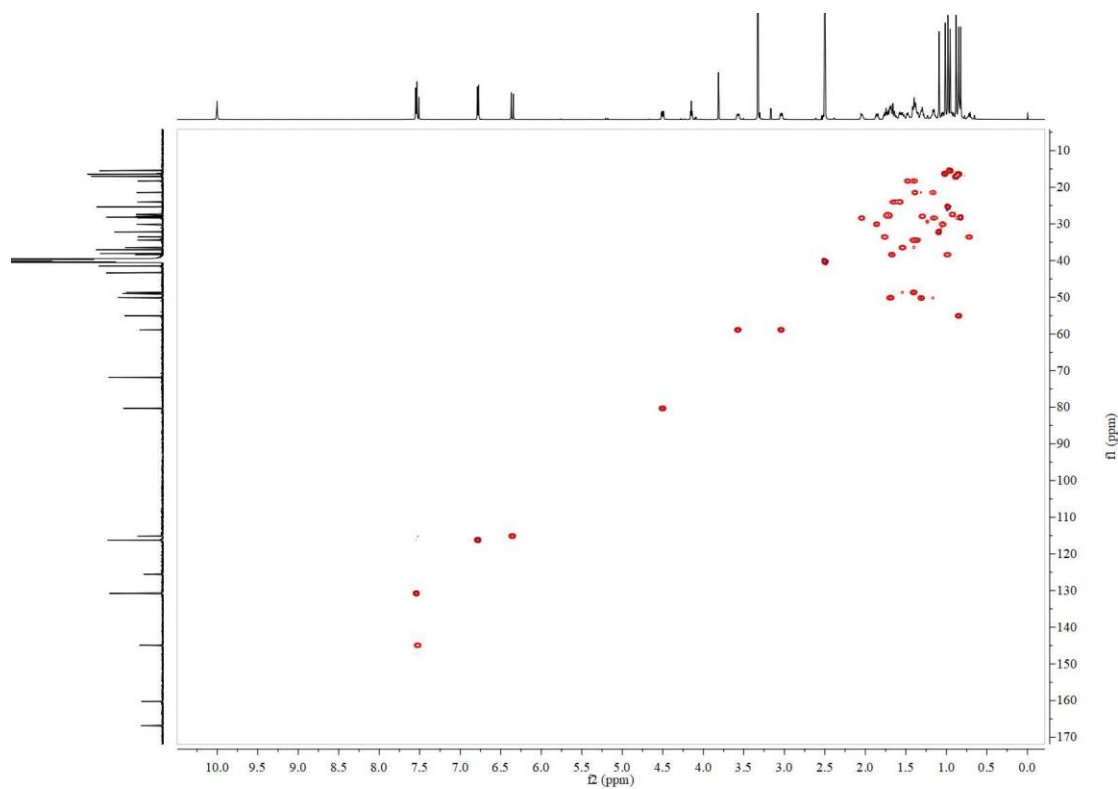

Figure S14 The HSQC spectrum of compound **2**.

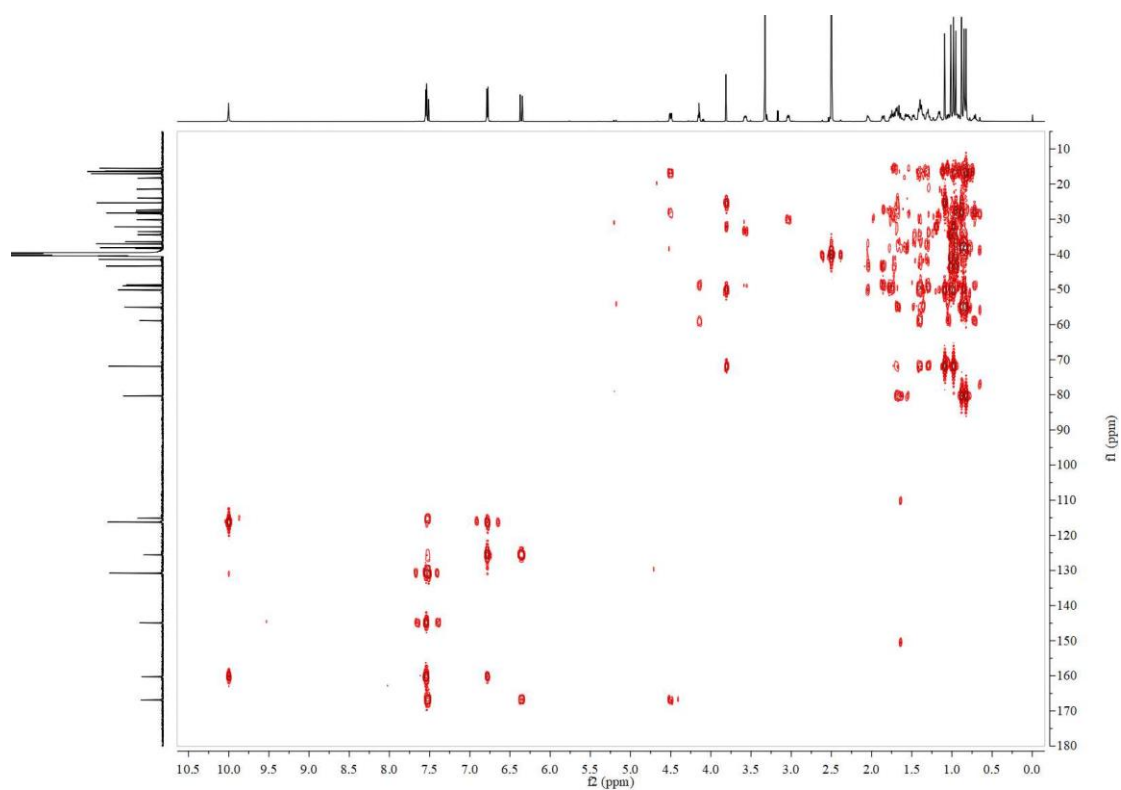

Figure S15 The HMBC spectrum of compound **2**.

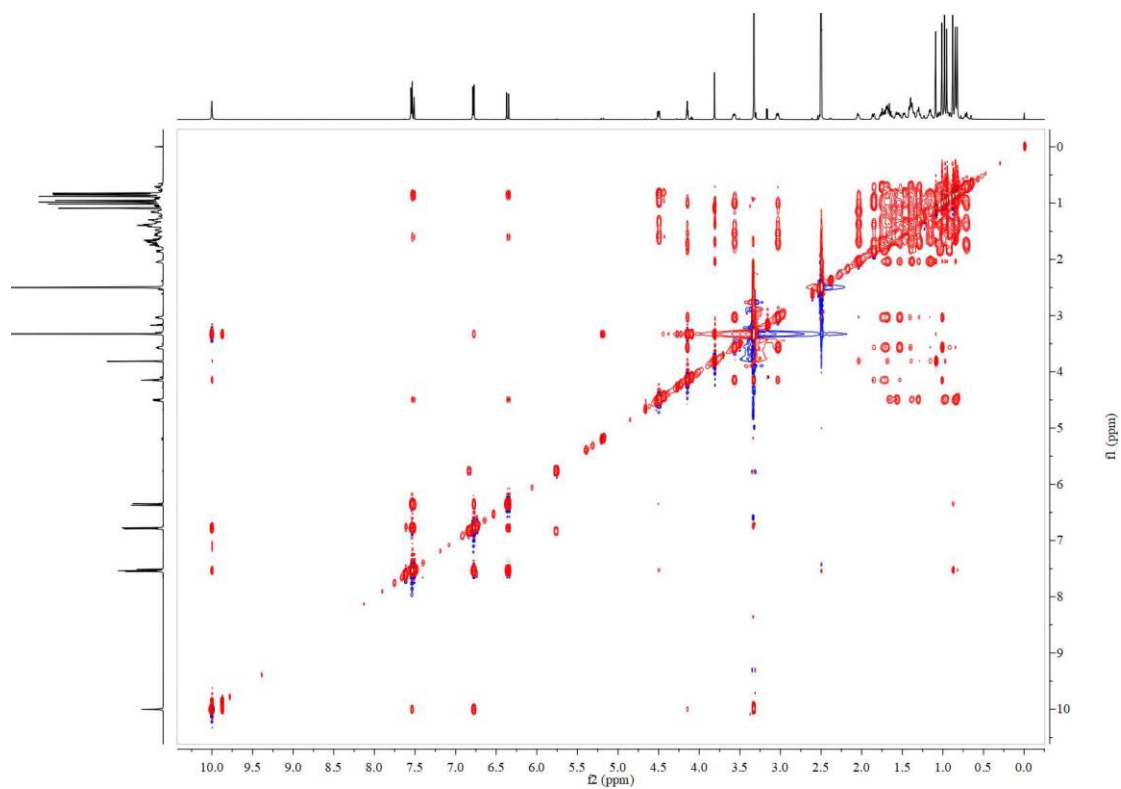

Figure S16 The NOESY spectrum of compound **2**.

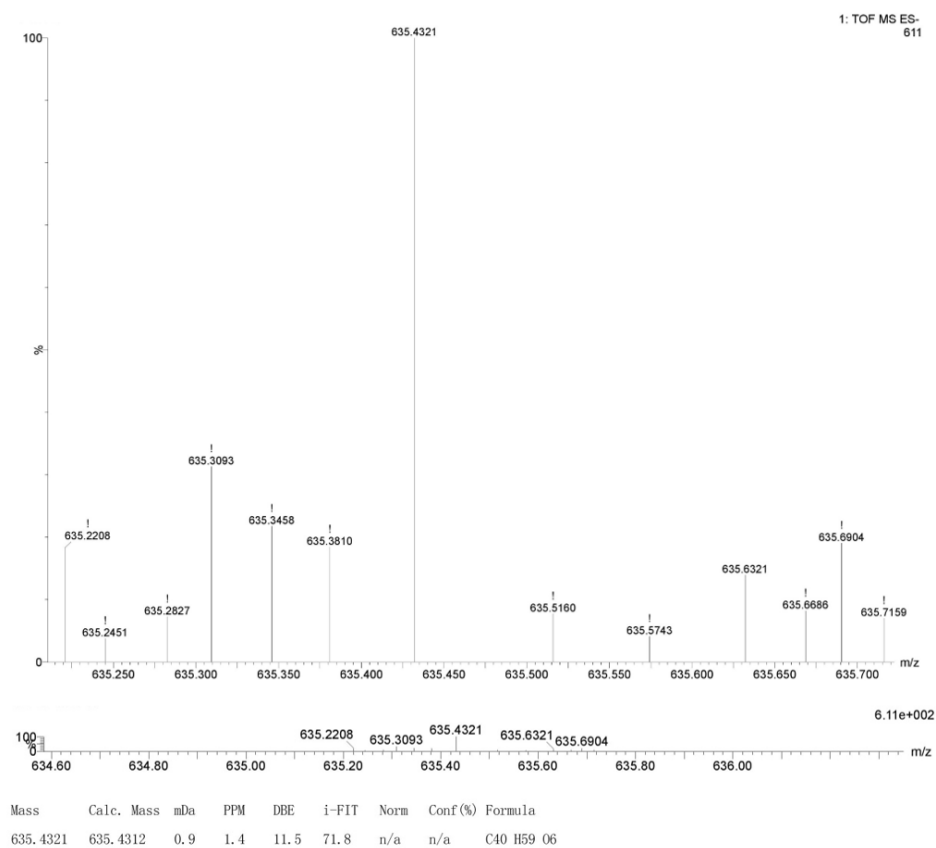

Figure S17 The HRESIMS spectrum of compound **3**.

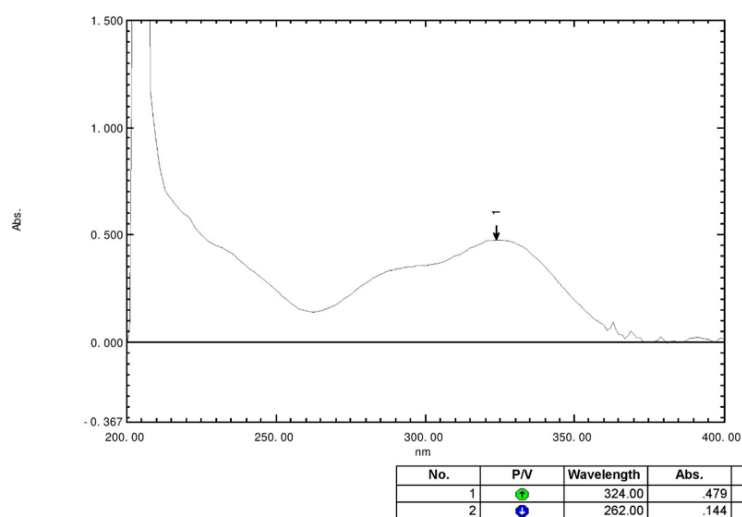

Figure S18 The UV spectrum of compound **3**.

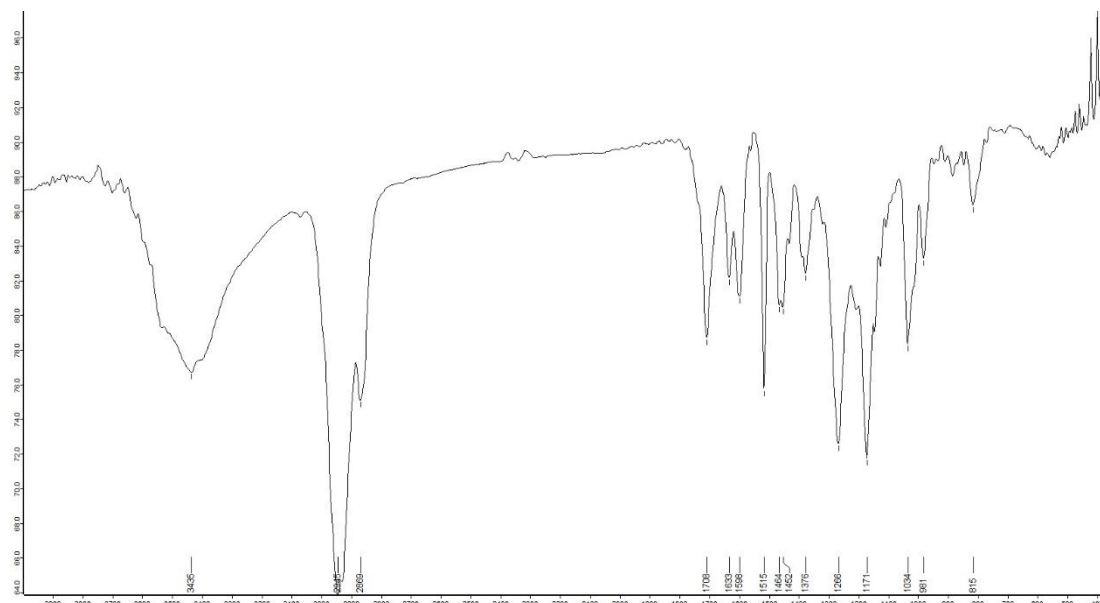

Figure S19 The IR spectrum of compound **3**.

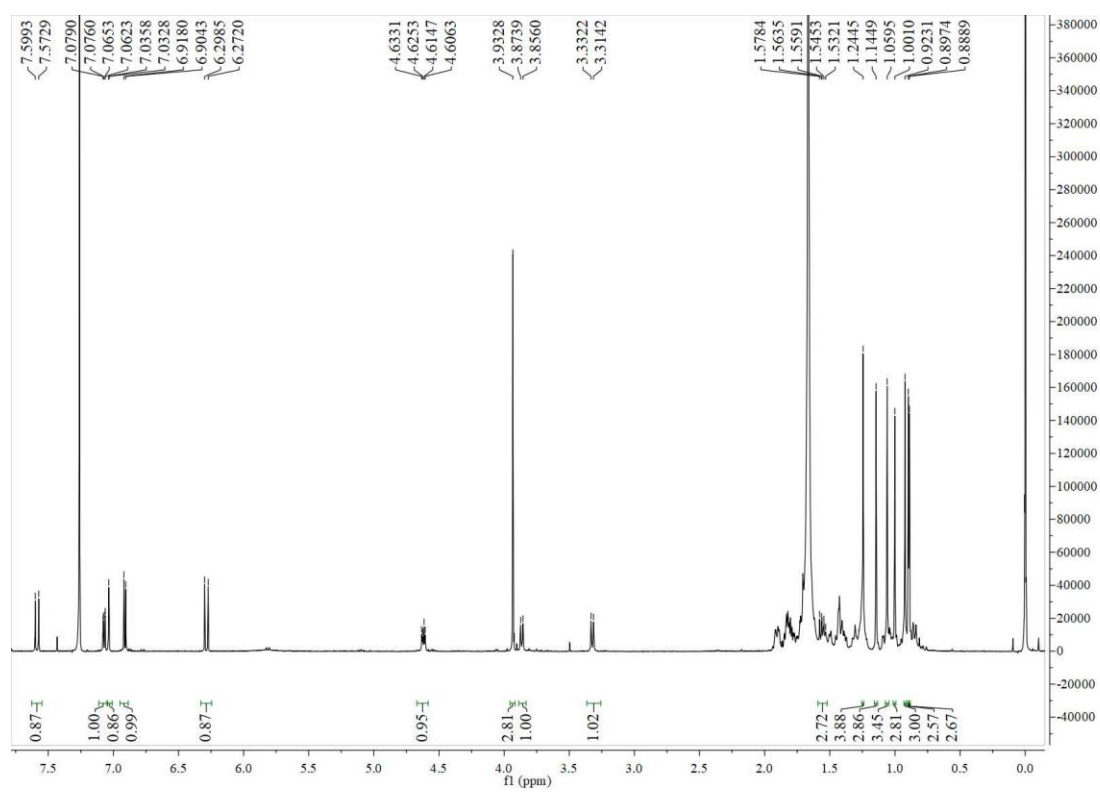

Figure S20 The  $^1\text{H}$ -NMR spectrum of compound **3**.

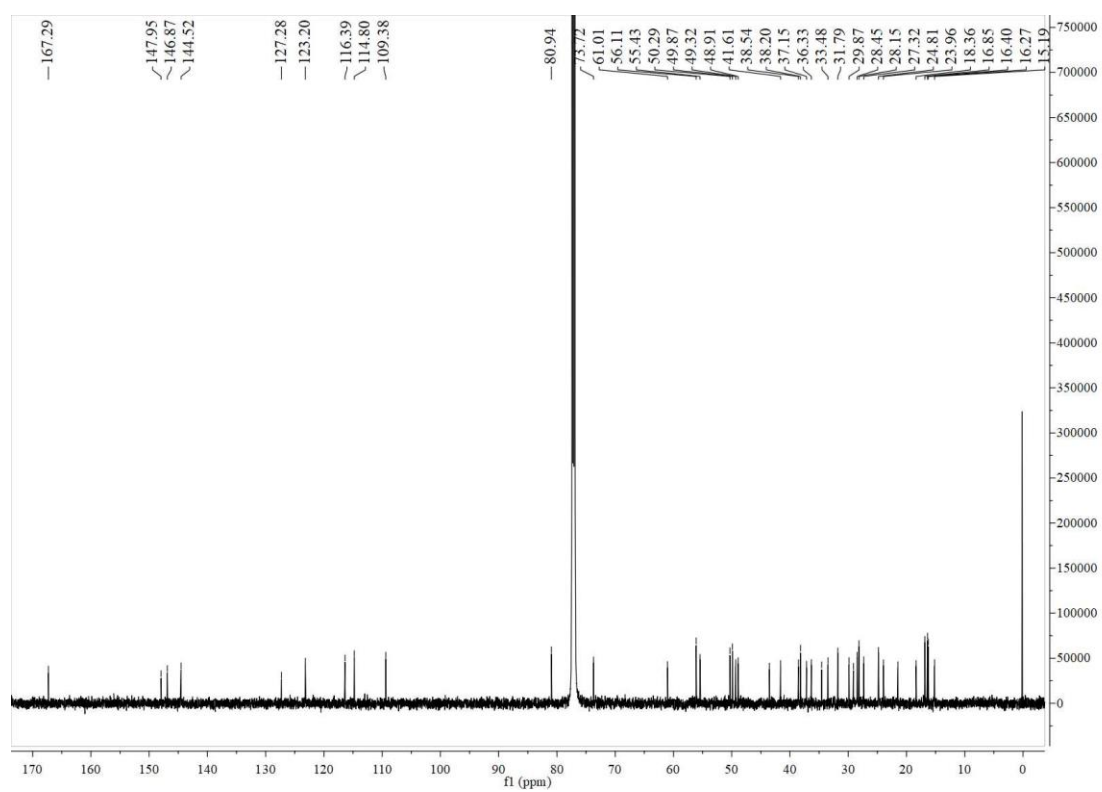

Figure S21 The  $^{13}\text{C}$ -NMR spectrum of compound **3**.

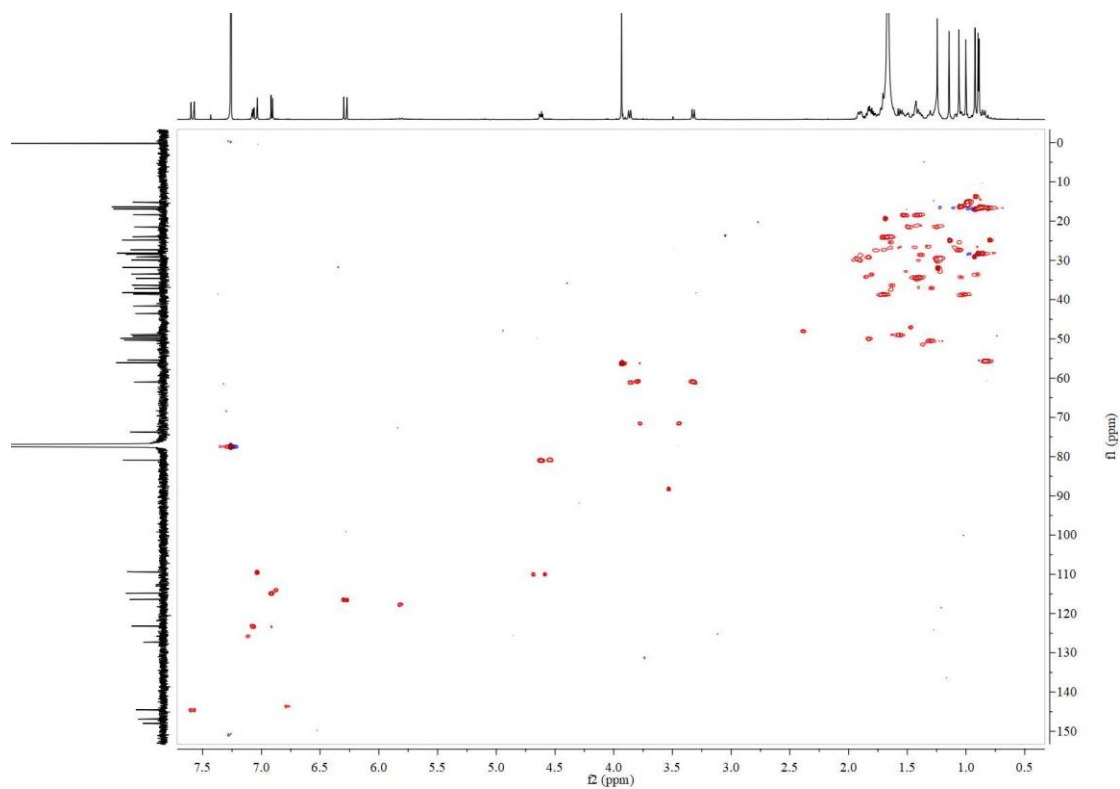

Figure S22 The HSQC spectrum of compound **3**.

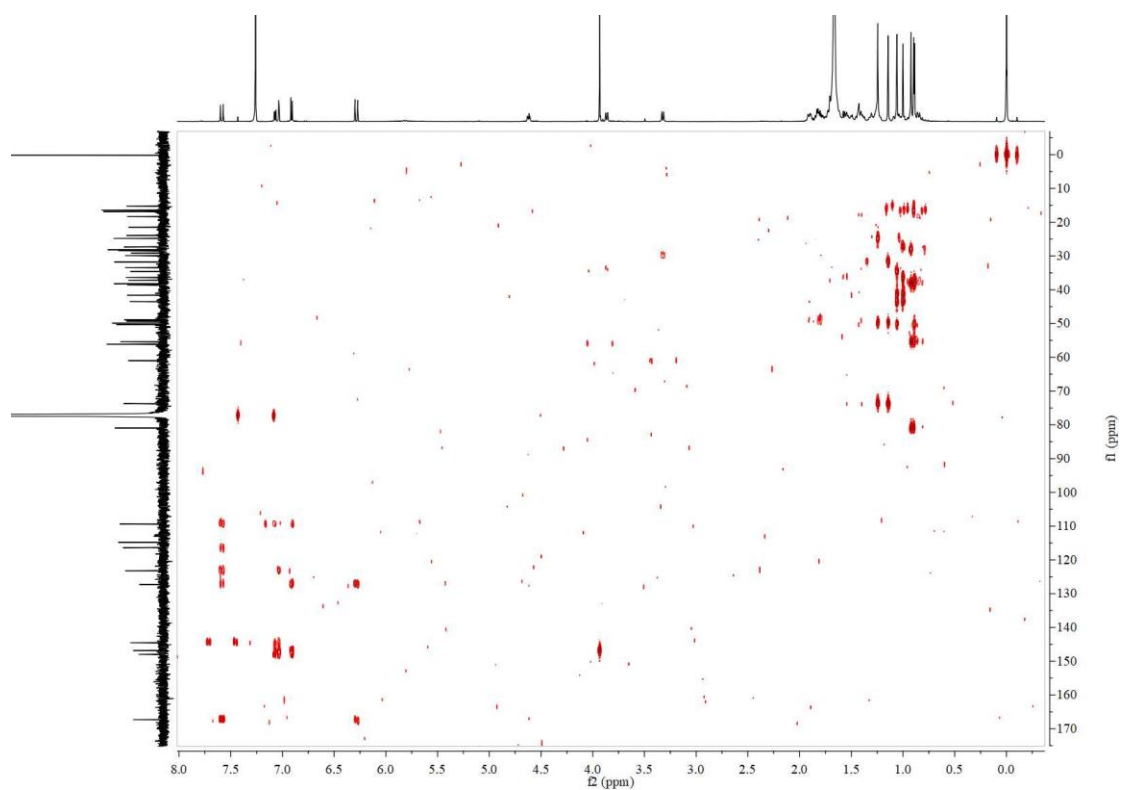

Figure S23 The HMBC spectrum of compound **3**.

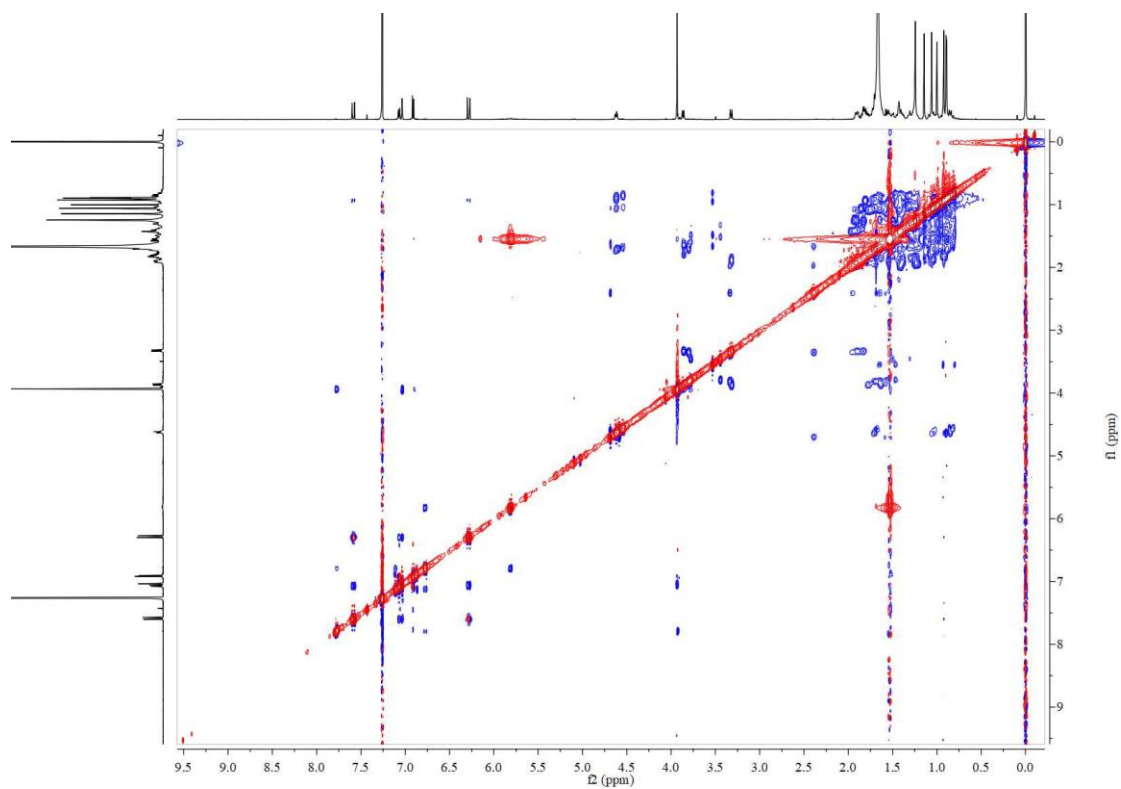

Figure S24 The NOESY spectrum of compound **3**.

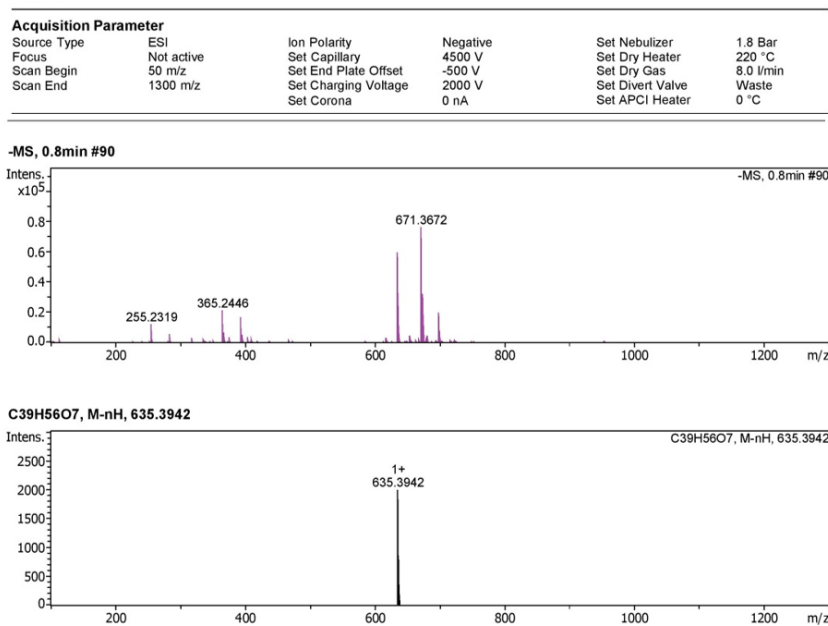

Figure S25 The HRESIMS spectrum of compound **4**.

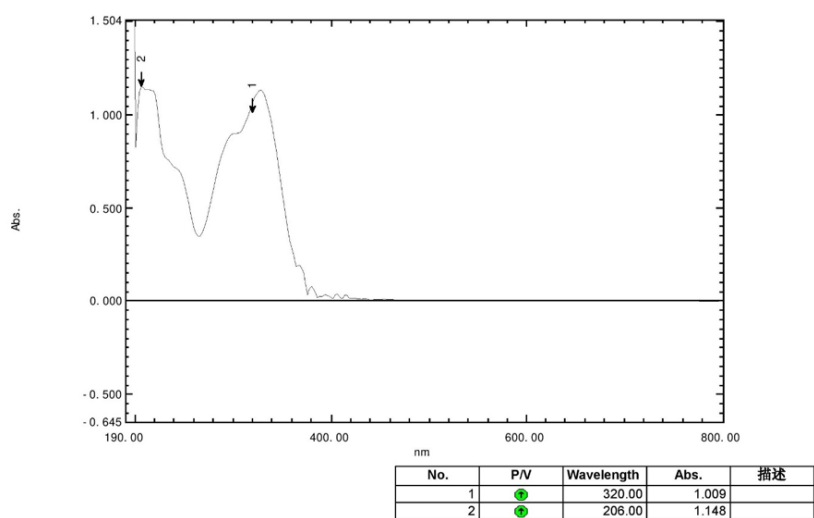

Figure S26 The UV spectrum of compound **4**.



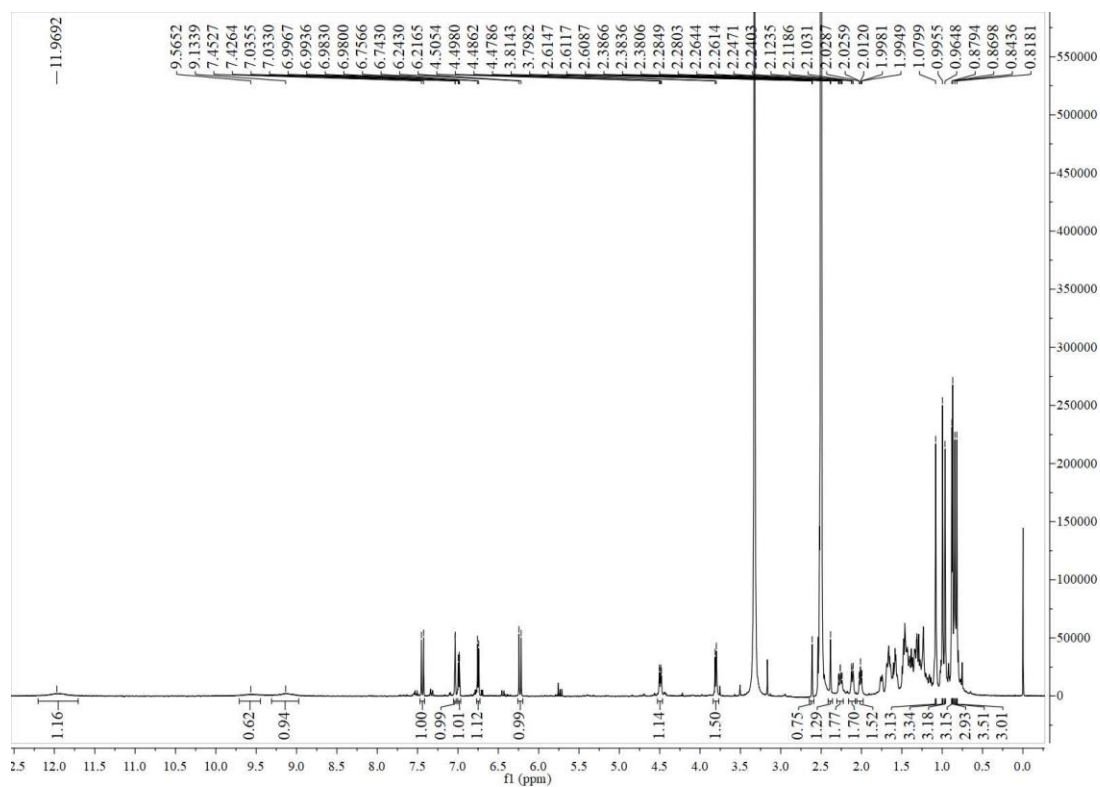

Figure S27 The  $^1\text{H}$ -NMR spectrum of compound **4**.

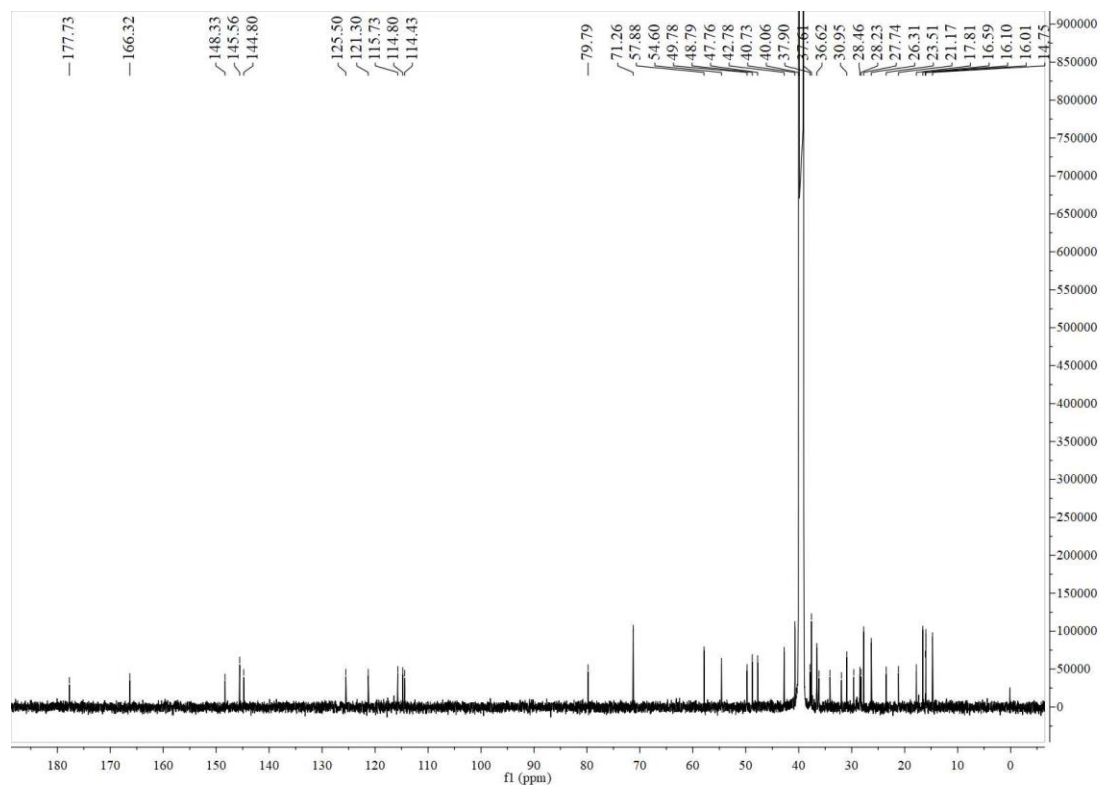

Figure S28 The  $^{13}\text{C}$ -NMR spectrum of compound **4**.

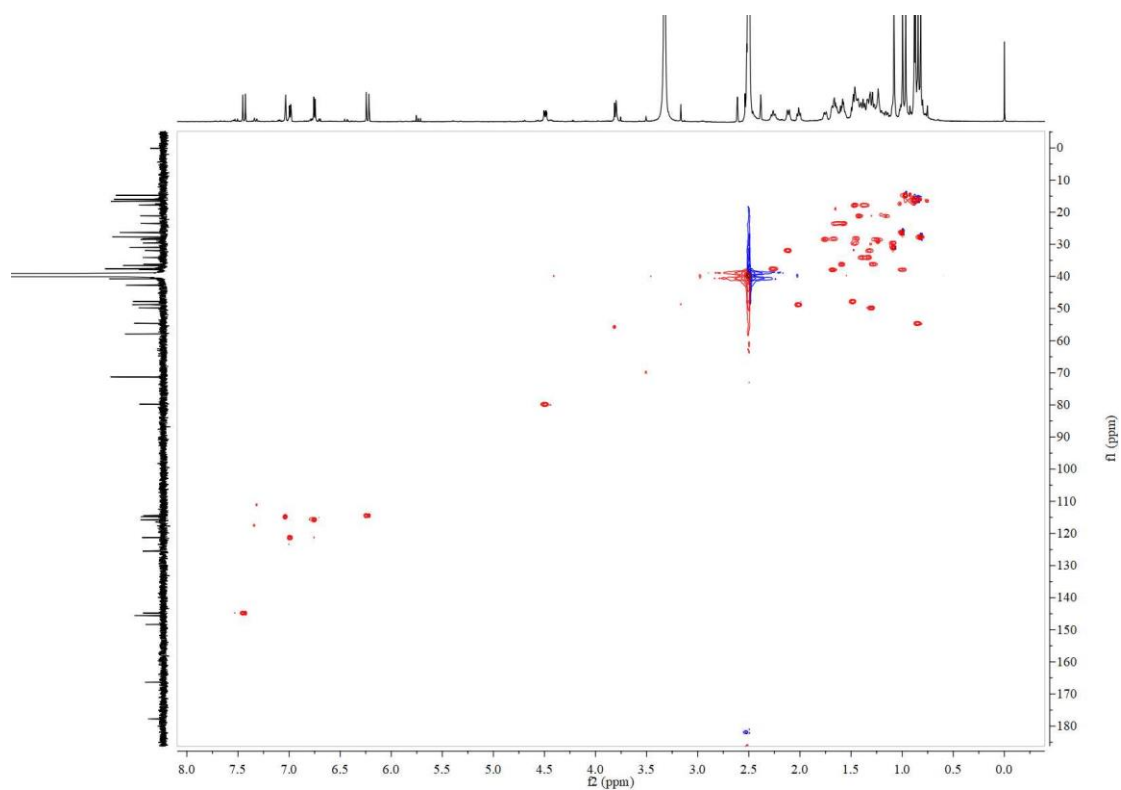

Figure S29 The HSQC spectrum of compound 4.

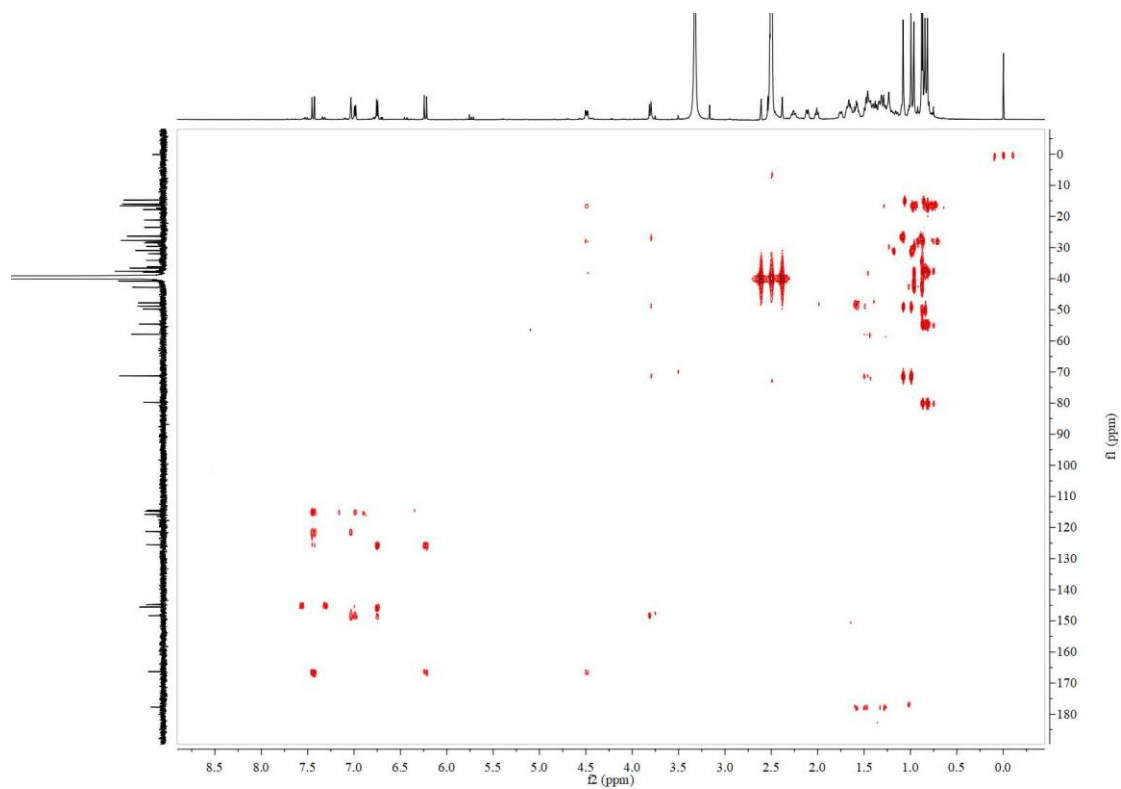

Figure S30 The HMBC spectrum of compound 4.

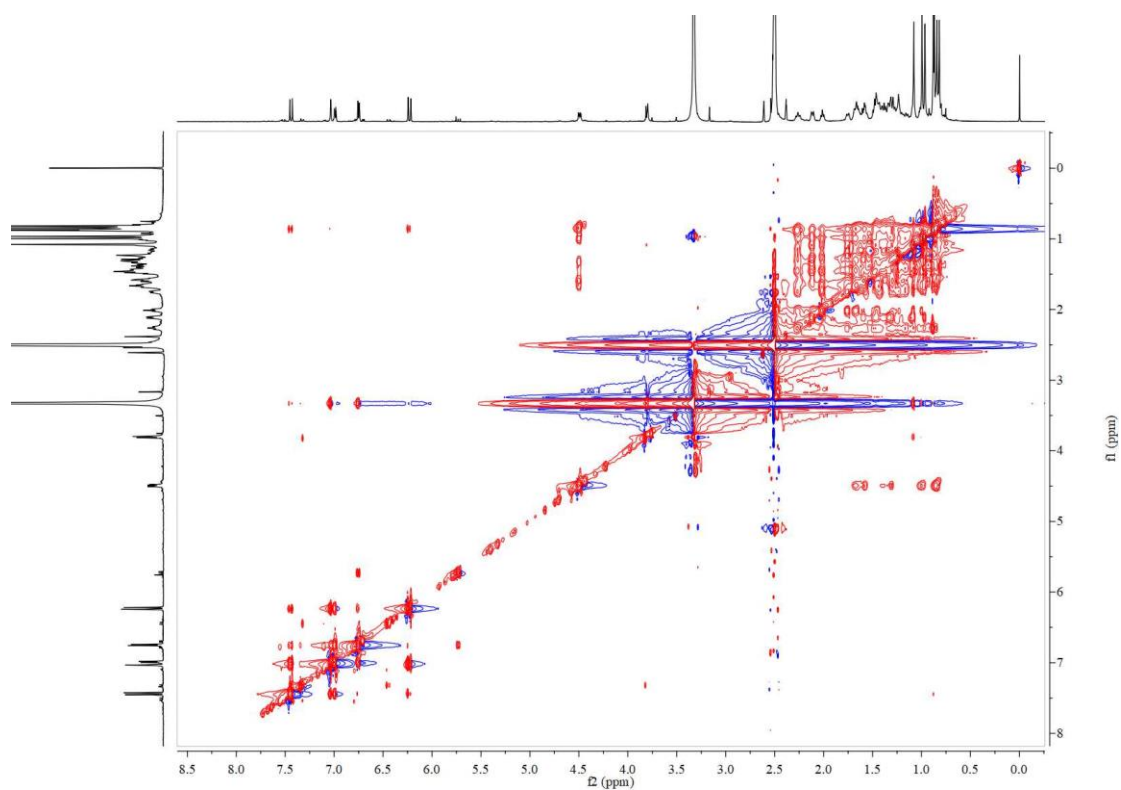

Figure S31 The NOESY spectrum of compound **4**.

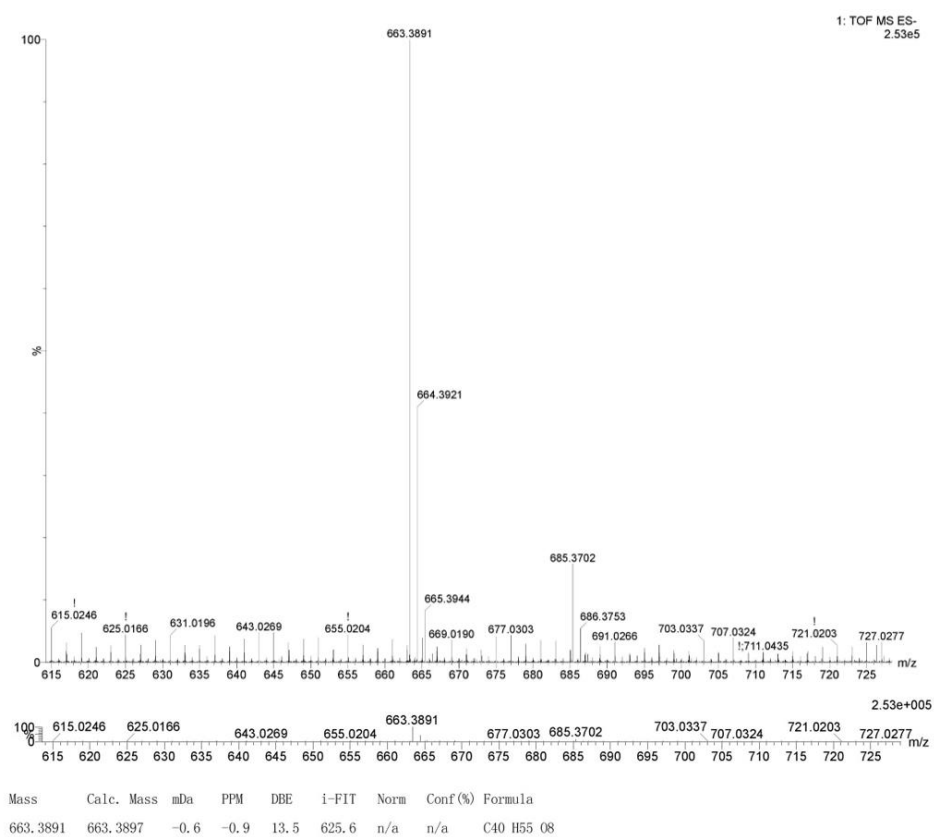

Figure S32 The HRESIMS spectrum of compound **8**.

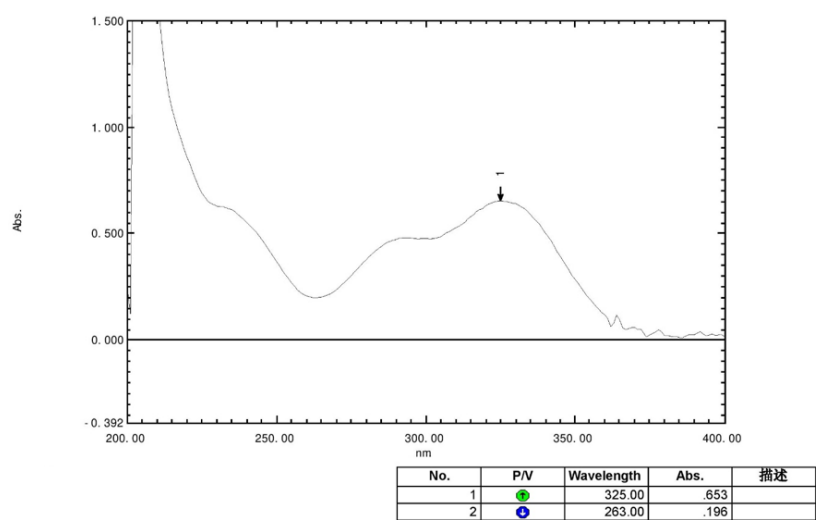

Figure S33 The UV spectrum of compound **8**.

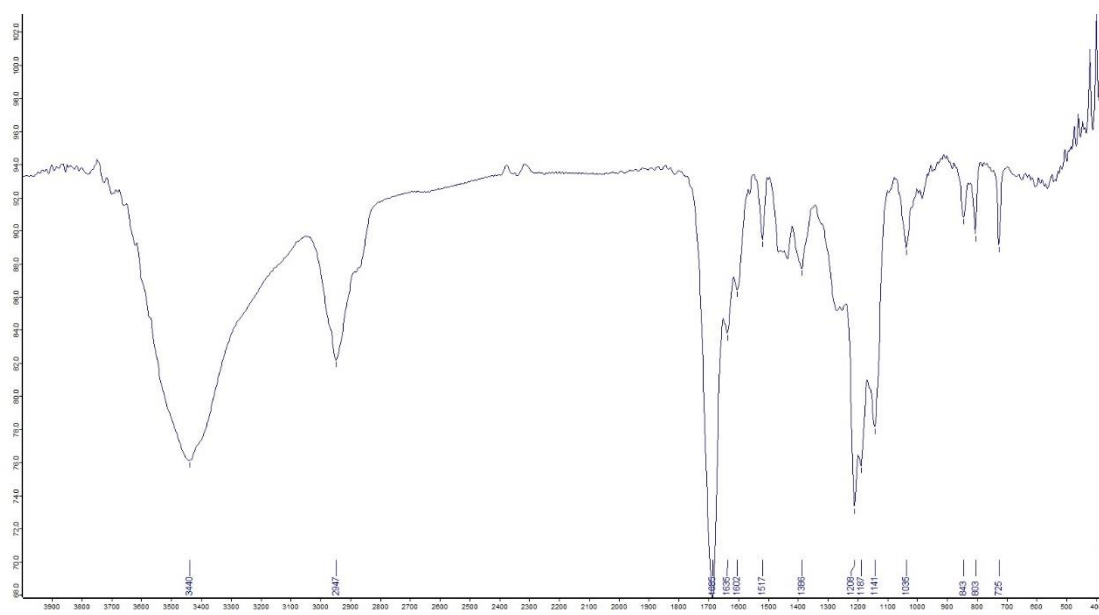

Figure S34 The IR spectrum of compound **8**.

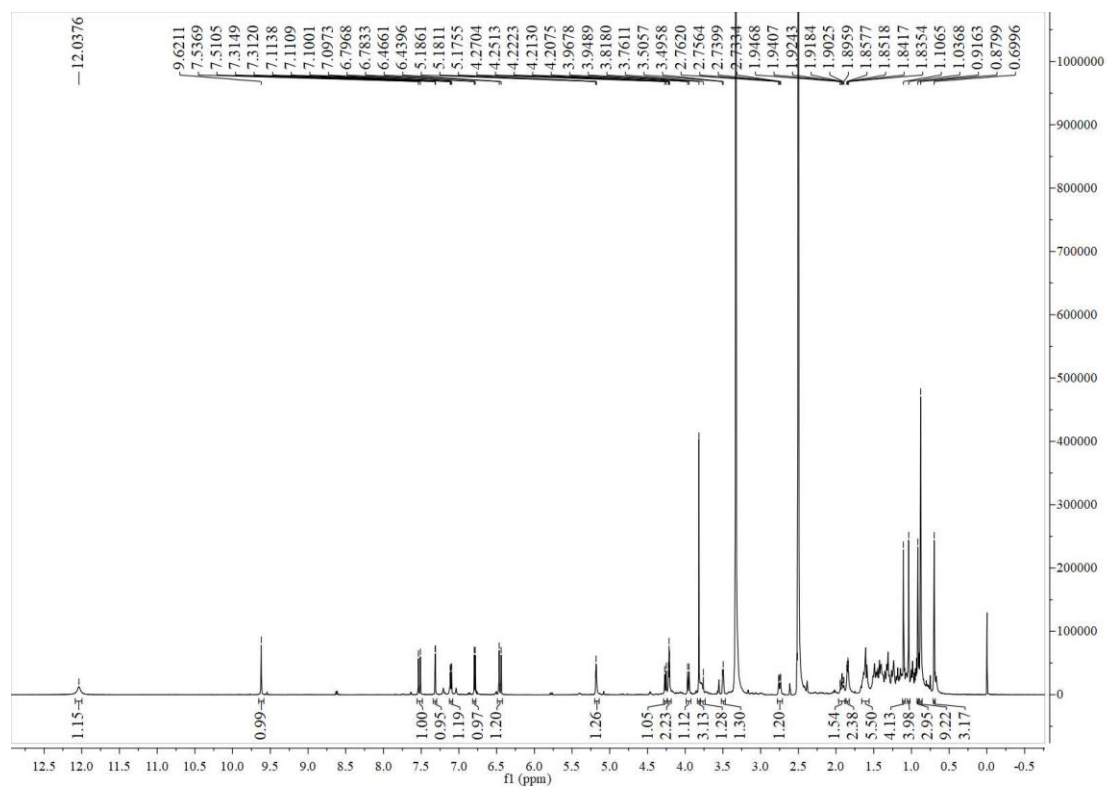

Figure S35 The <sup>1</sup>H-NMR spectrum of compound **8**.

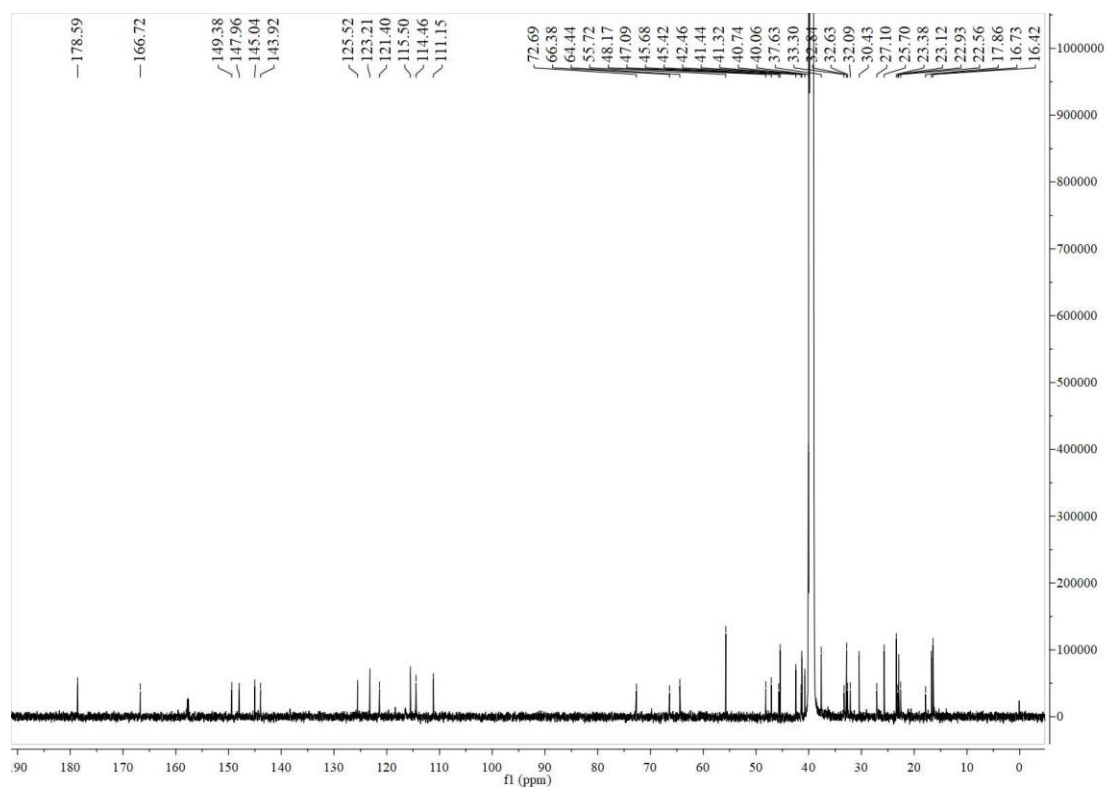

Figure S36 The <sup>13</sup>C-NMR spectrum of compound **8**.

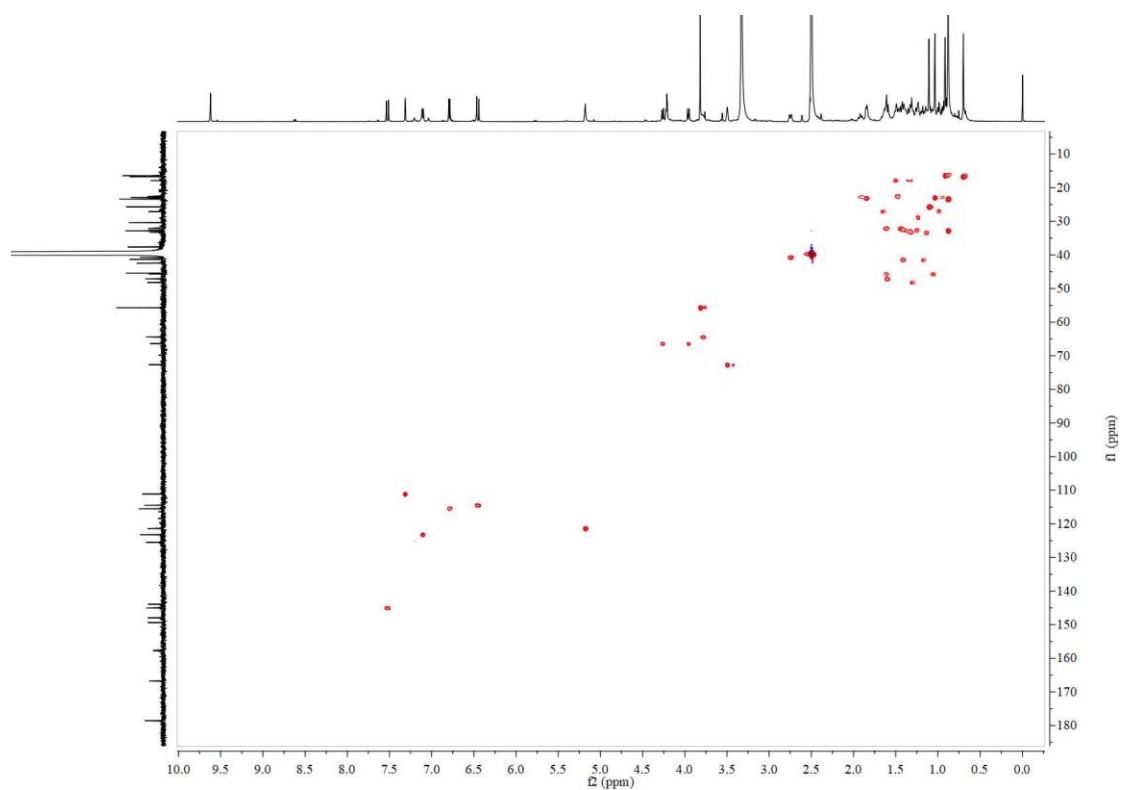

Figure S37 The HSQC spectrum of compound **8**.

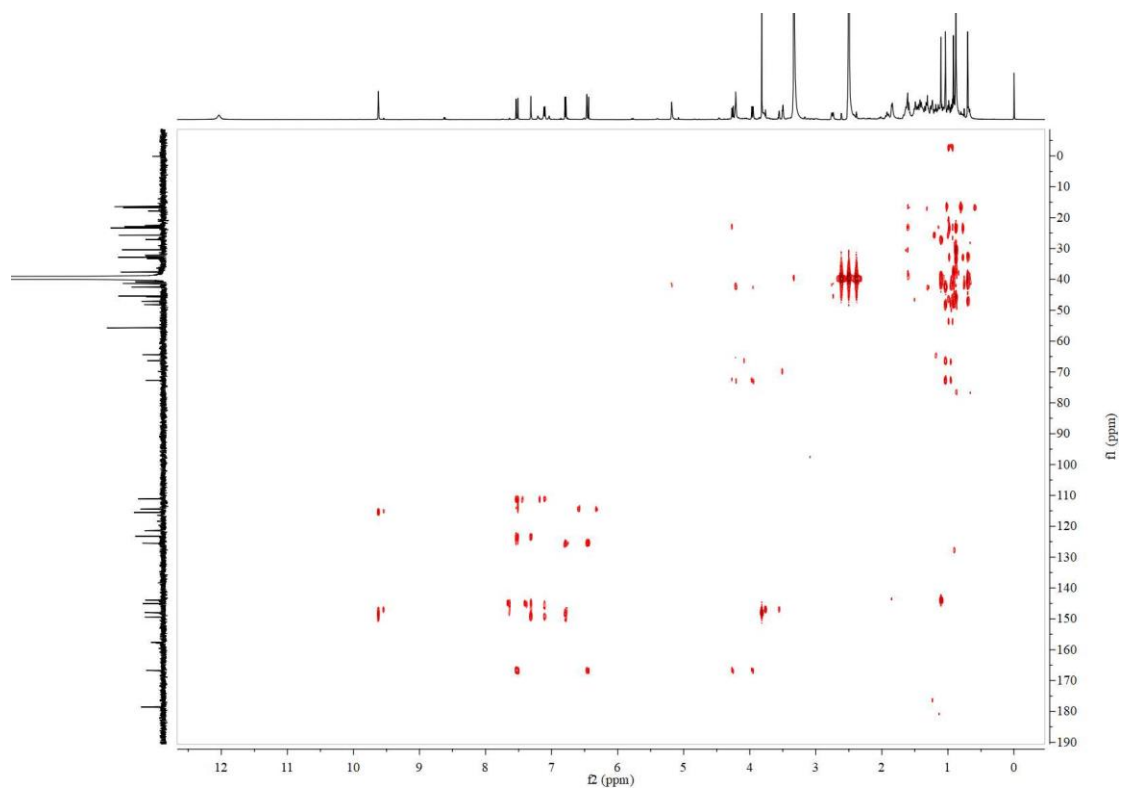

Figure S38 The HMBC spectrum of compound **8**.

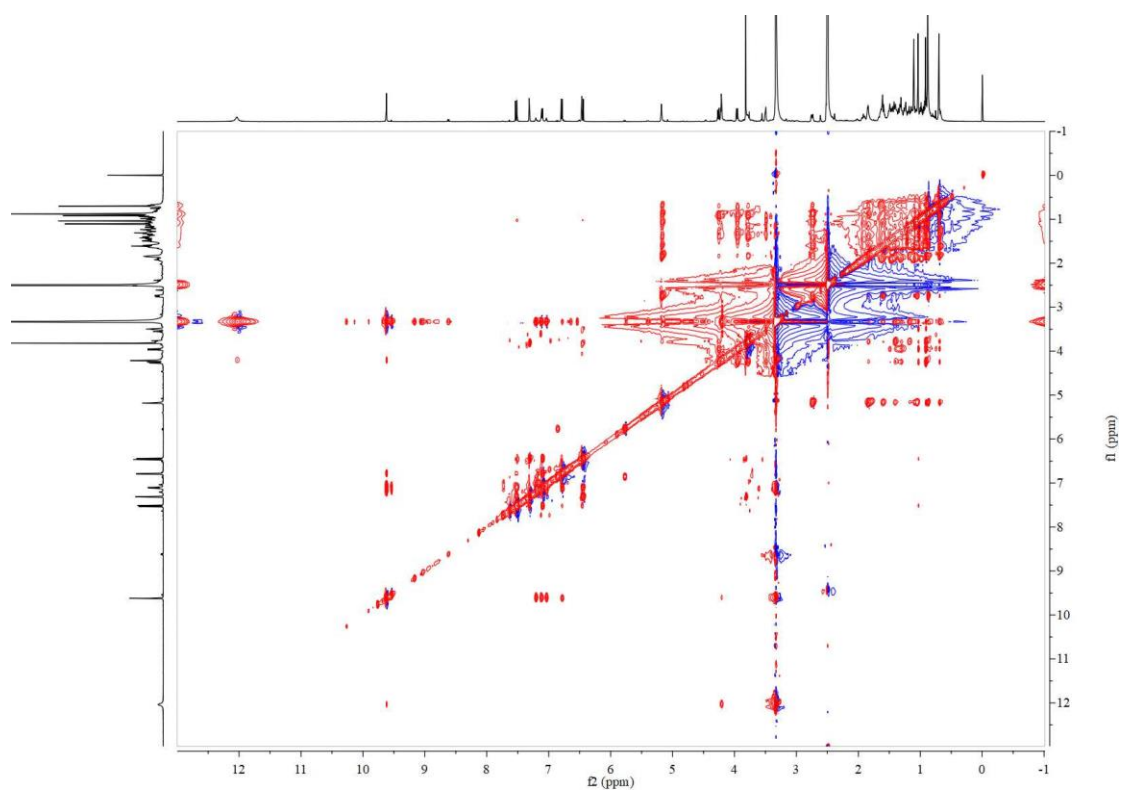

Figure S39 The NOESY spectrum of compound **8**.

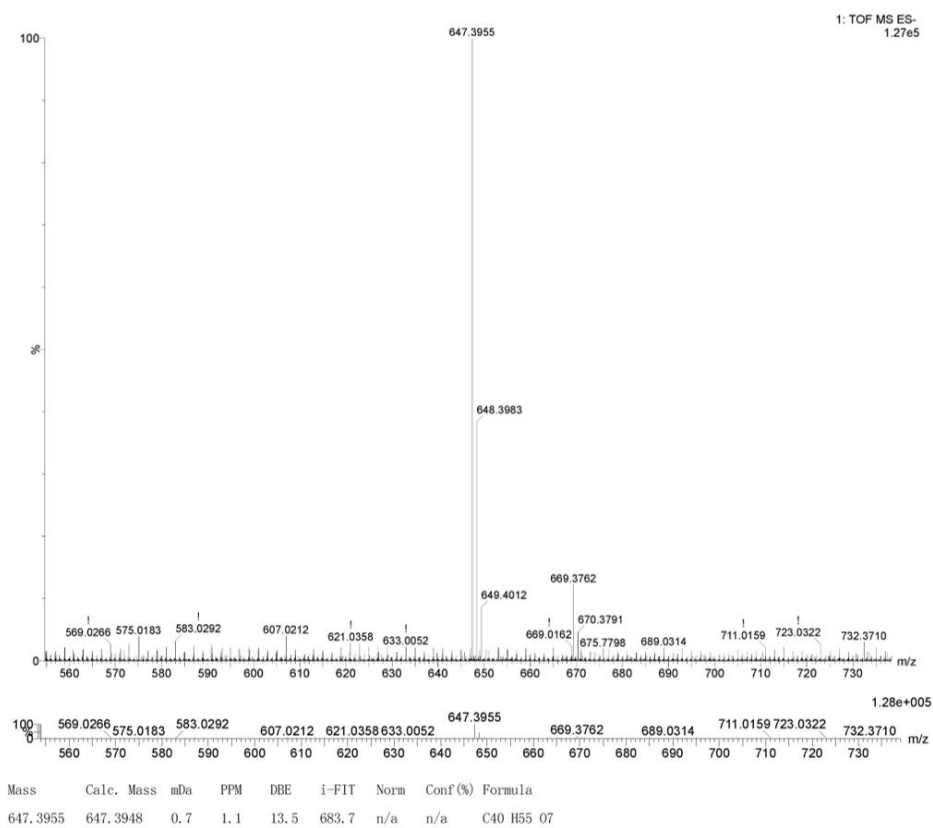

Figure S40 The HRESIMS spectrum of compound **9**.

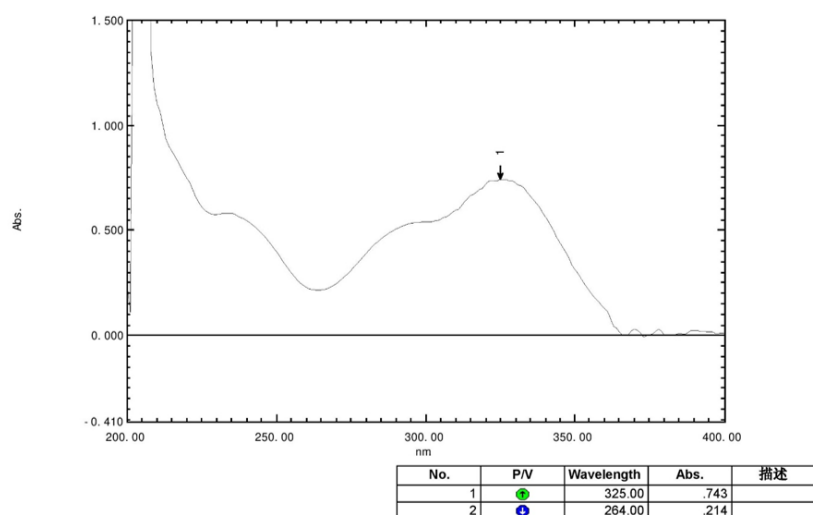

Figure S41 The UV spectrum of compound **9**.

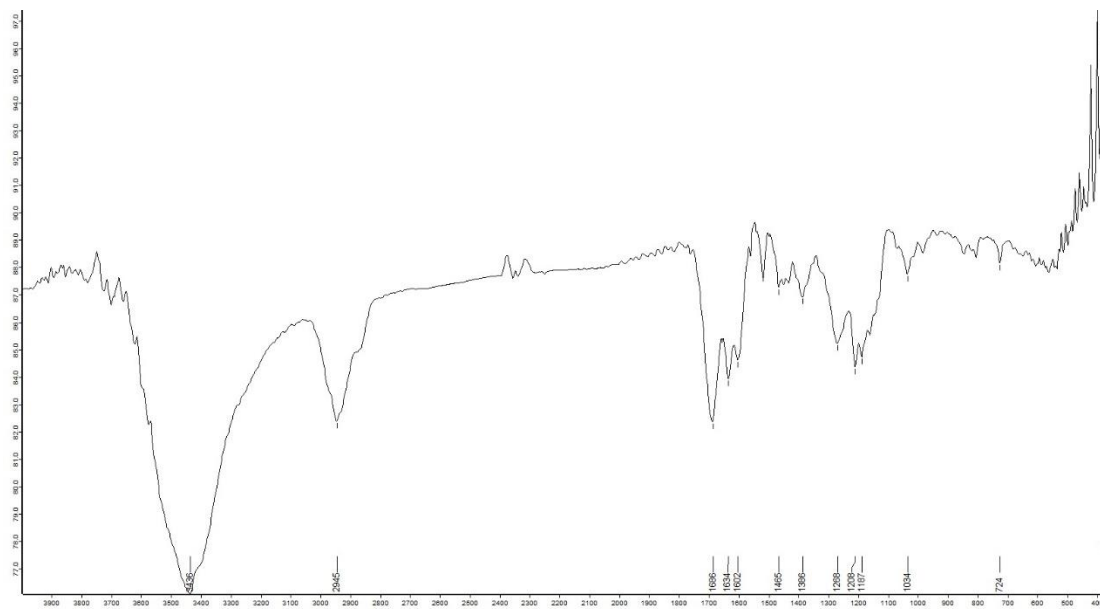

Figure S42 The IR spectrum of compound **9**.



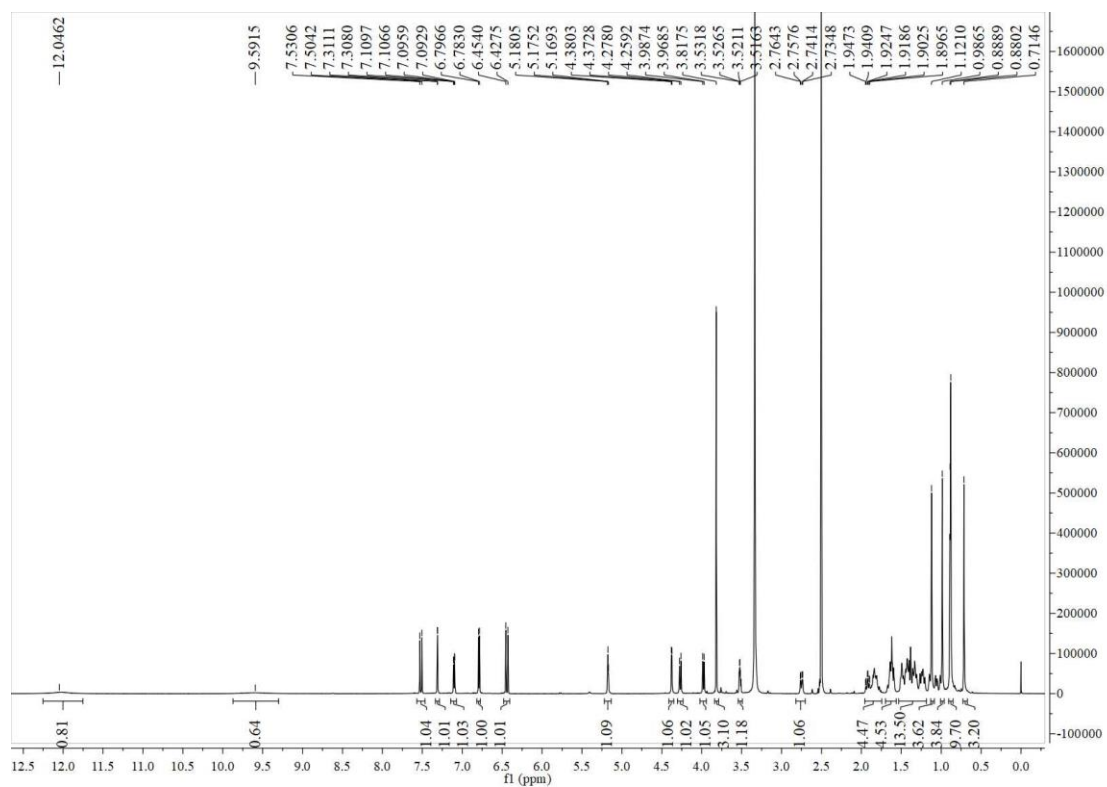

Figure S43 The <sup>1</sup>H-NMR spectrum of compound 9.

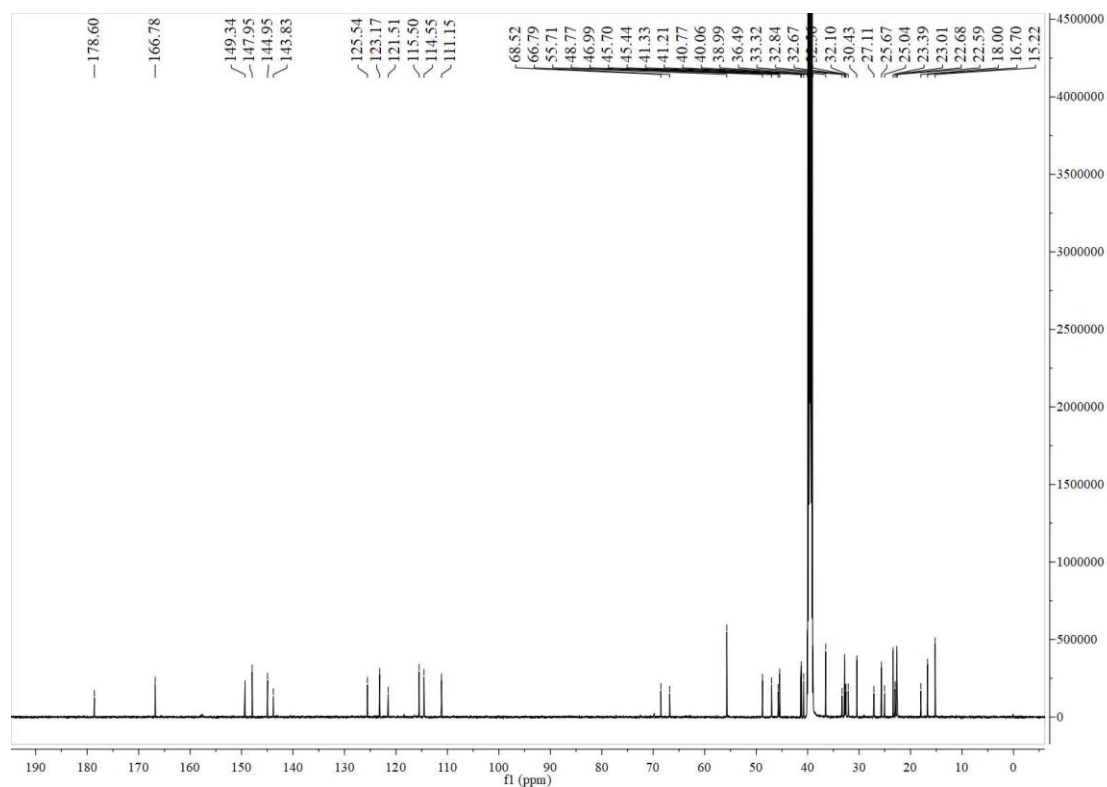

Figure S44 The <sup>13</sup>C-NMR spectrum of compound 9.

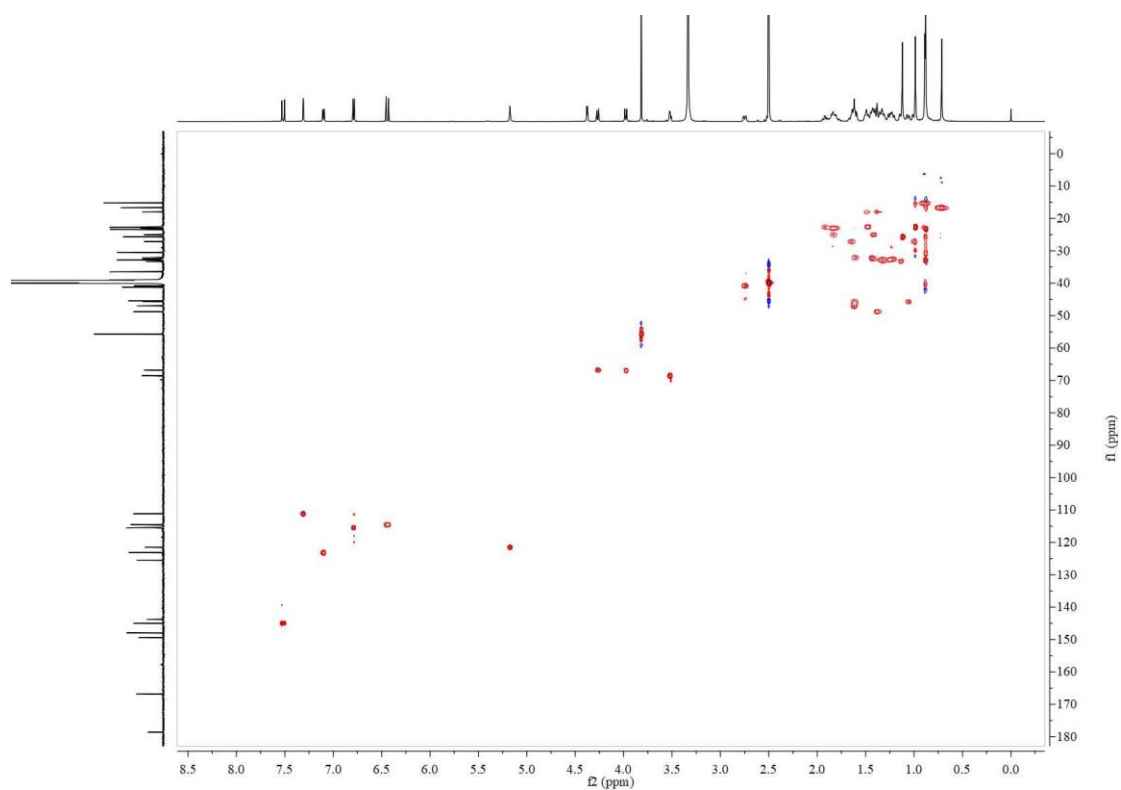

Figure S45 The HSQC spectrum of compound **9**.

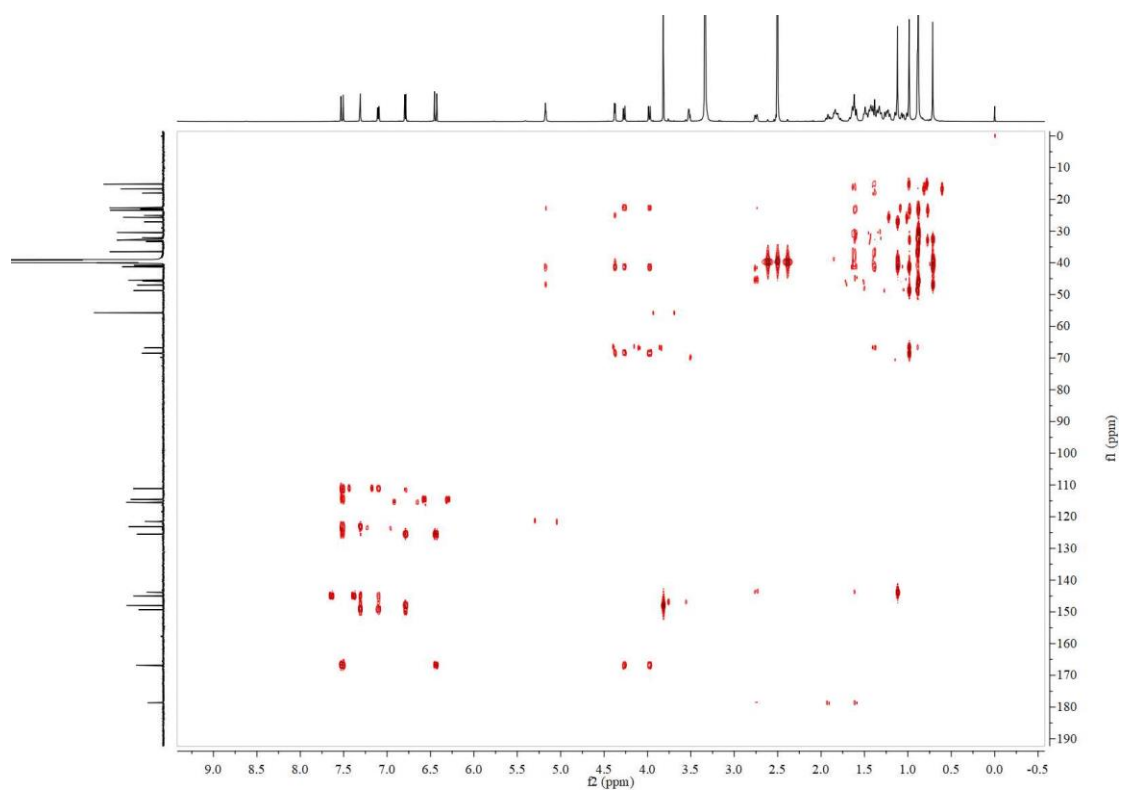

Figure S46 The HMBC spectrum of compound **9**.

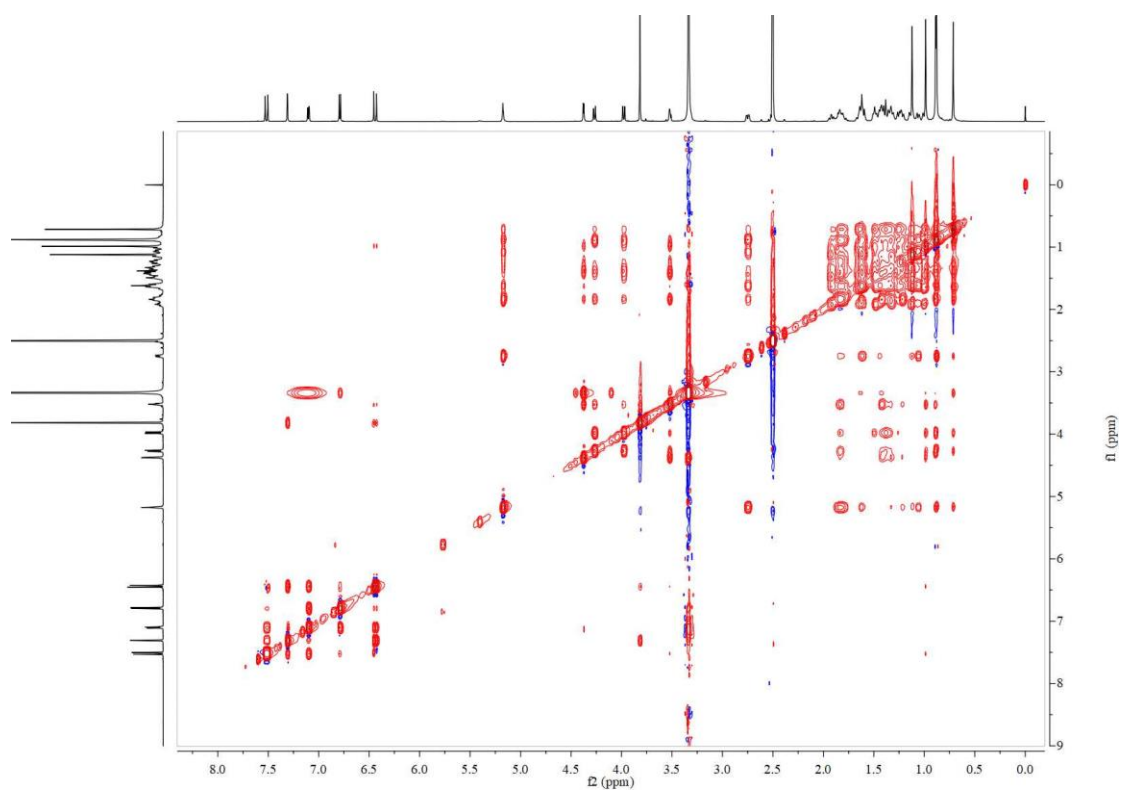

Figure S47 The NOESY spectrum of compound **9**.

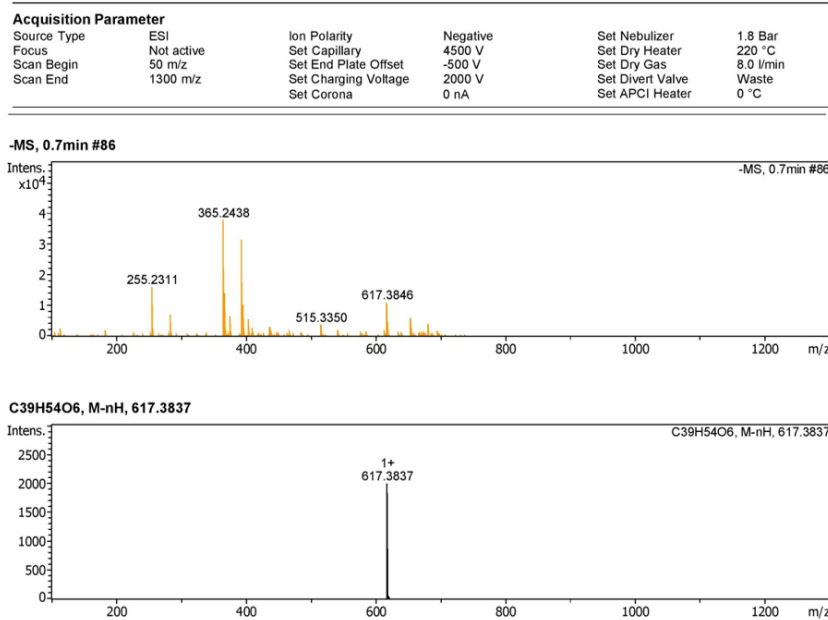

Figure S48 The HRESIMS spectrum of compound **10**.

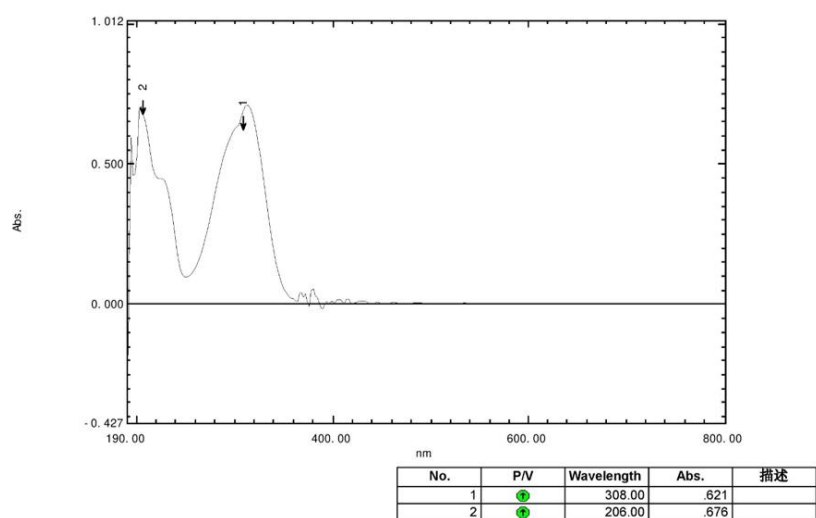

Figure S49 The UV spectrum of compound **10**.

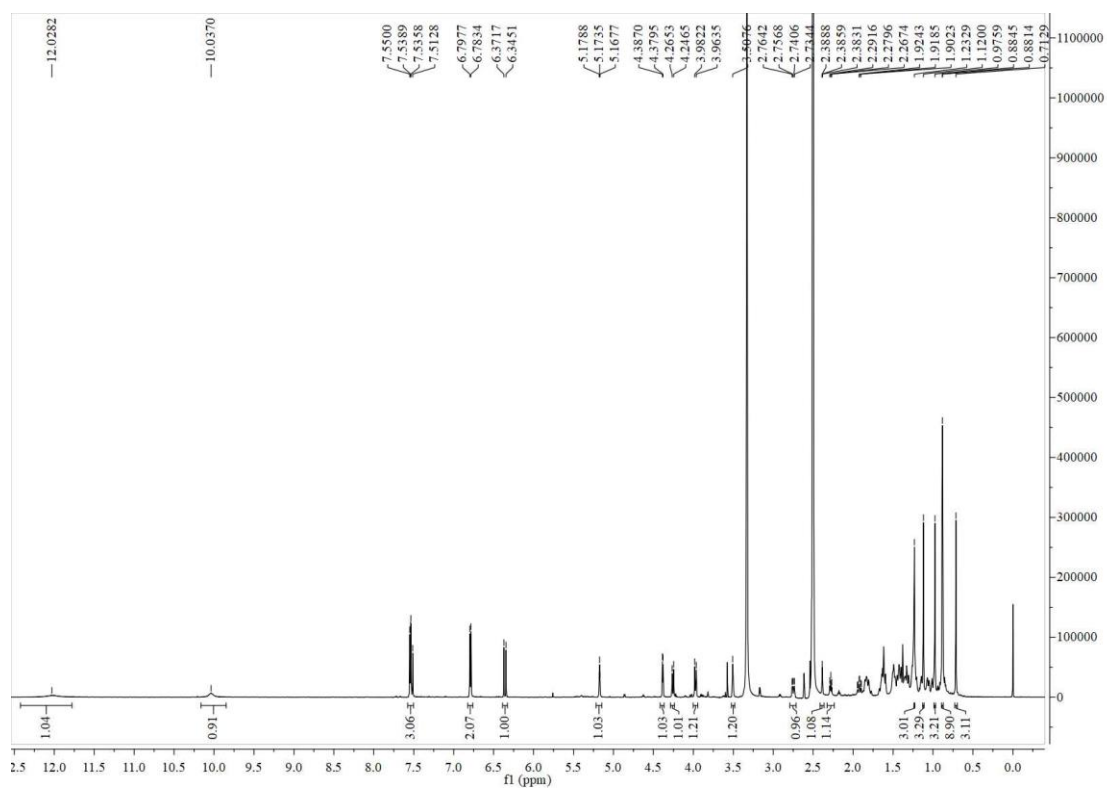

Figure S50 The  $^1\text{H}$ -NMR spectrum of compound **10**.

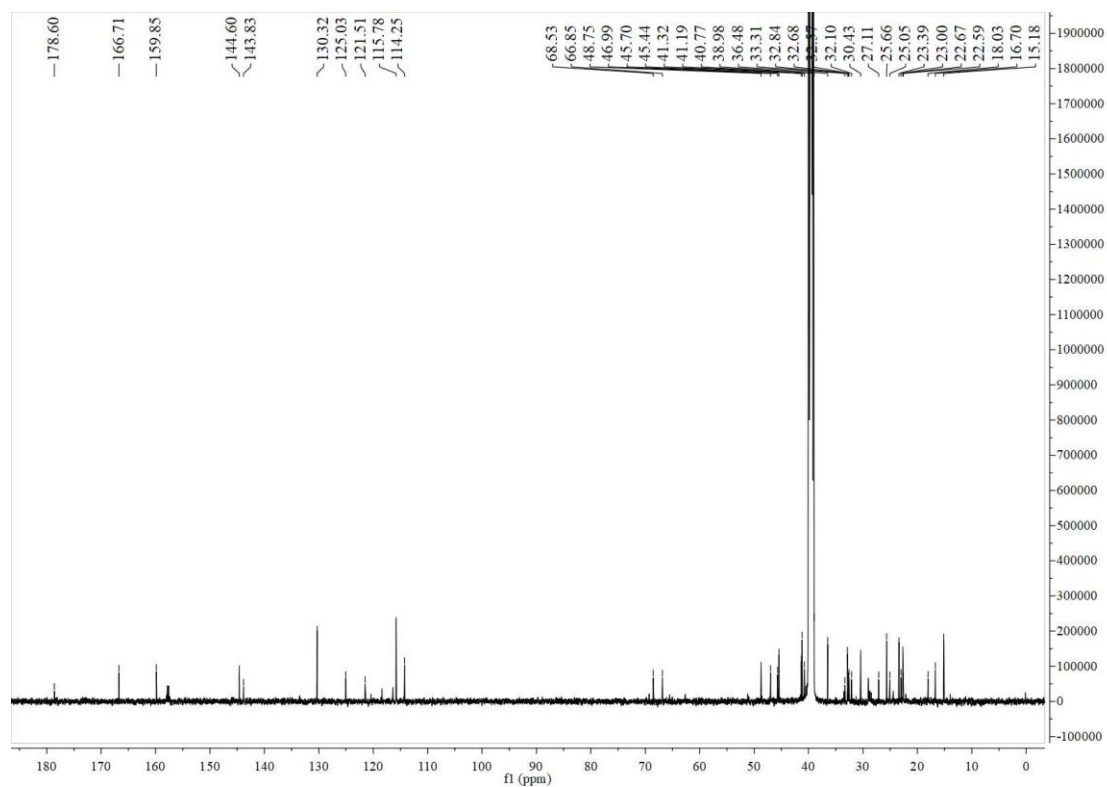

Figure S51 The  $^{13}\text{C}$ -NMR spectrum of compound **10**.

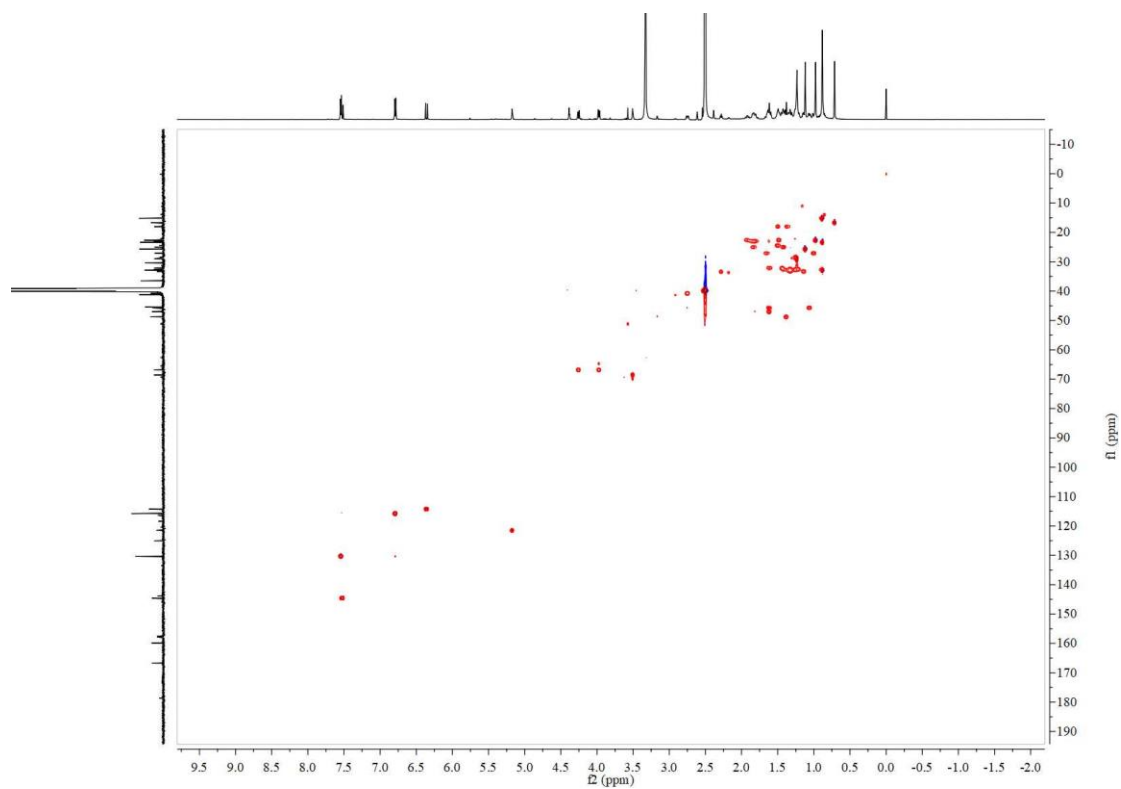

Figure S52 The HSQC spectrum of compound **10**.

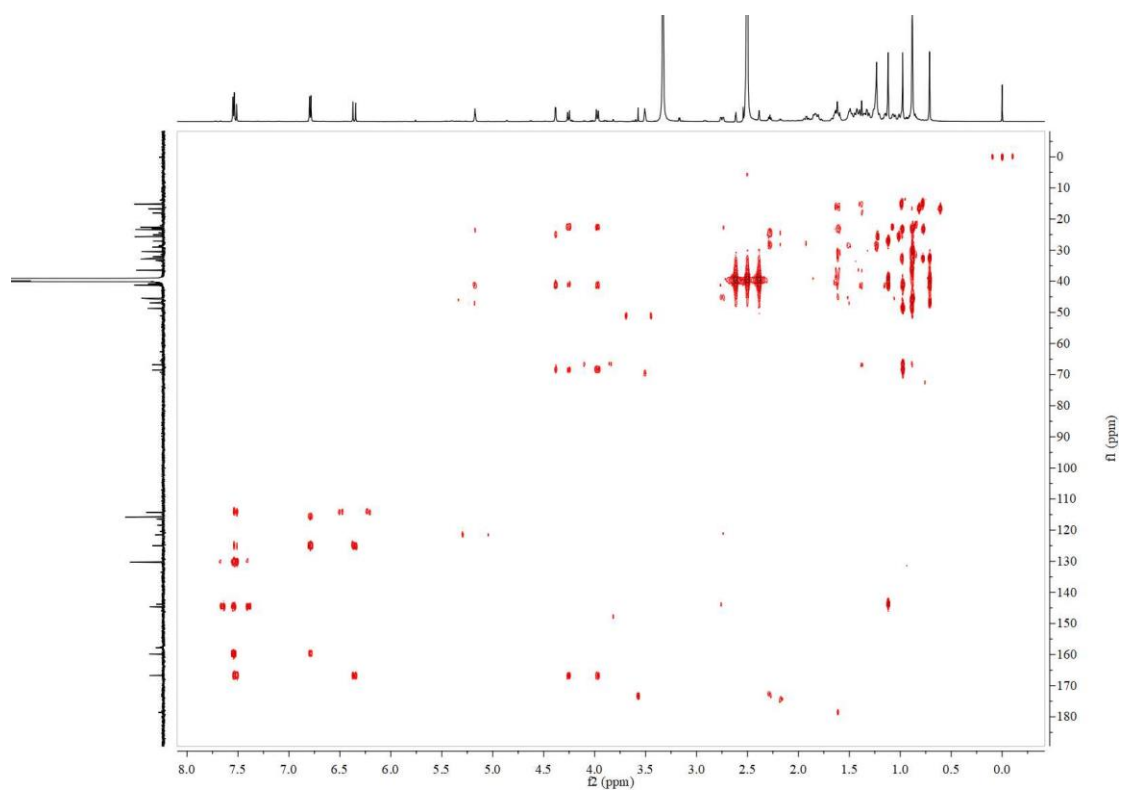

Figure S53 The HMBC spectrum of compound **10**.

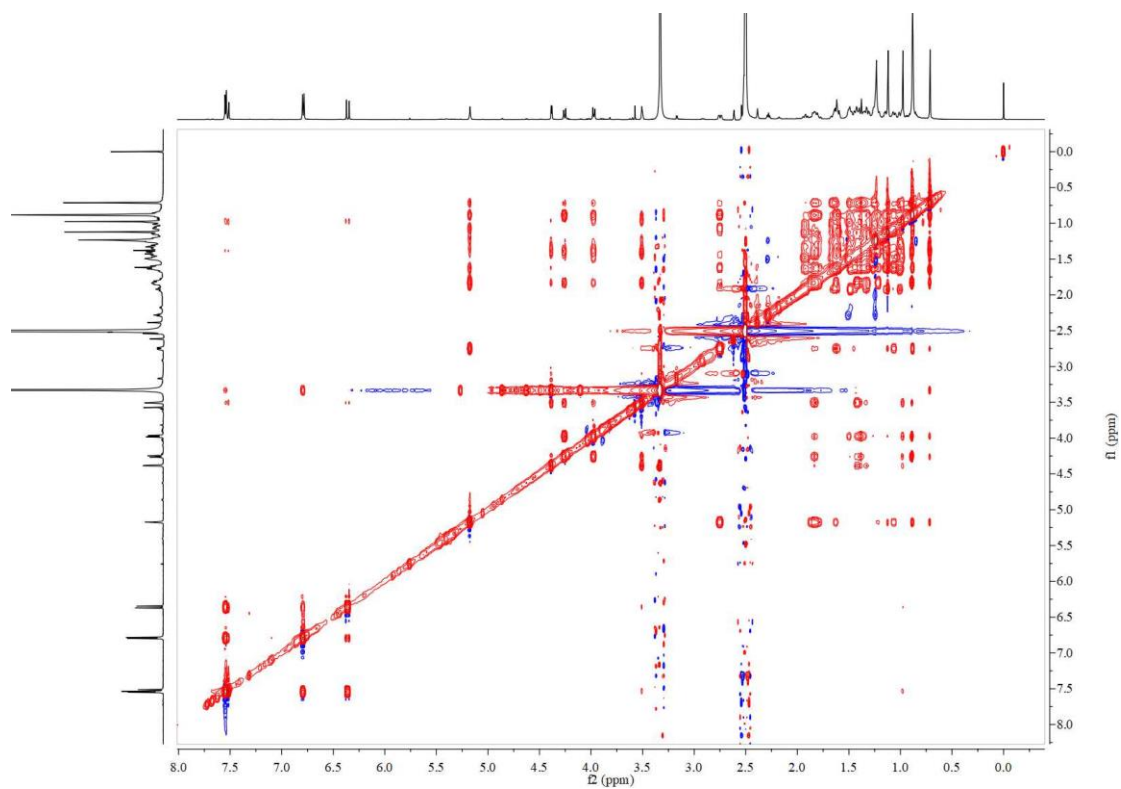

Figure S54 The NOESY spectrum of compound **10**.

| Acquisition Parameter |            |                      |          |                  |           |
|-----------------------|------------|----------------------|----------|------------------|-----------|
| Source Type           | ESI        | Ion Polarity         | Negative | Set Nebulizer    | 1.8 Bar   |
| Focus                 | Not active | Set Capillary        | 4500 V   | Set Dry Heater   | 220 °C    |
| Scan Begin            | 50 m/z     | Set End Plate Offset | -500 V   | Set Dry Gas      | 8.0 l/min |
| Scan End              | 1300 m/z   | Set Charging Voltage | 2000 V   | Set Divert Valve | Waste     |
|                       |            | Set Corona           | 0 nA     | Set APCI Heater  | 0 °C      |

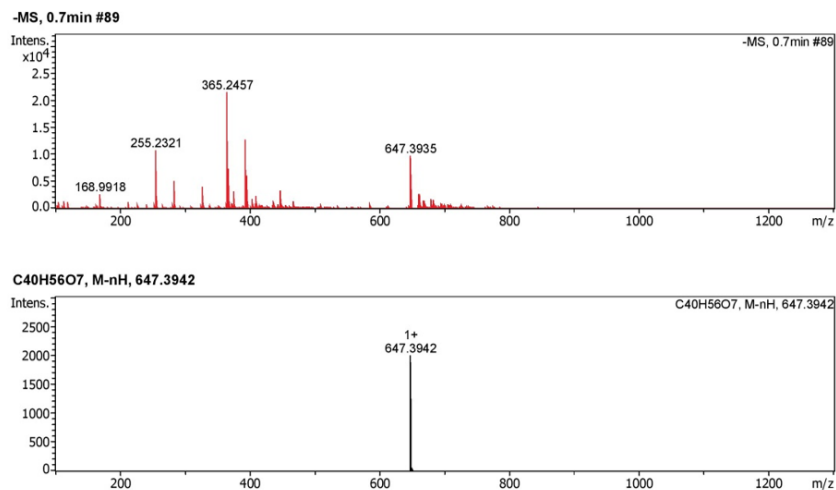

Figure S55 The HRESIMS spectrum of compound **11**.

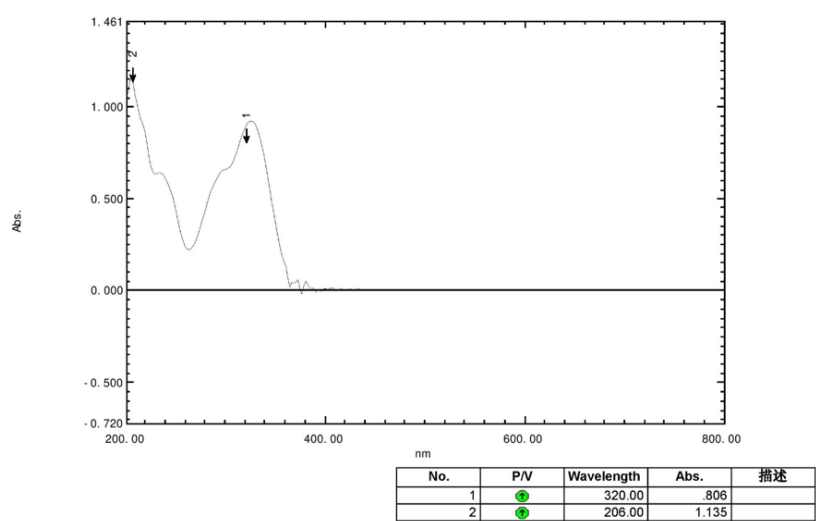

Figure S56 The UV spectrum of compound **11**.

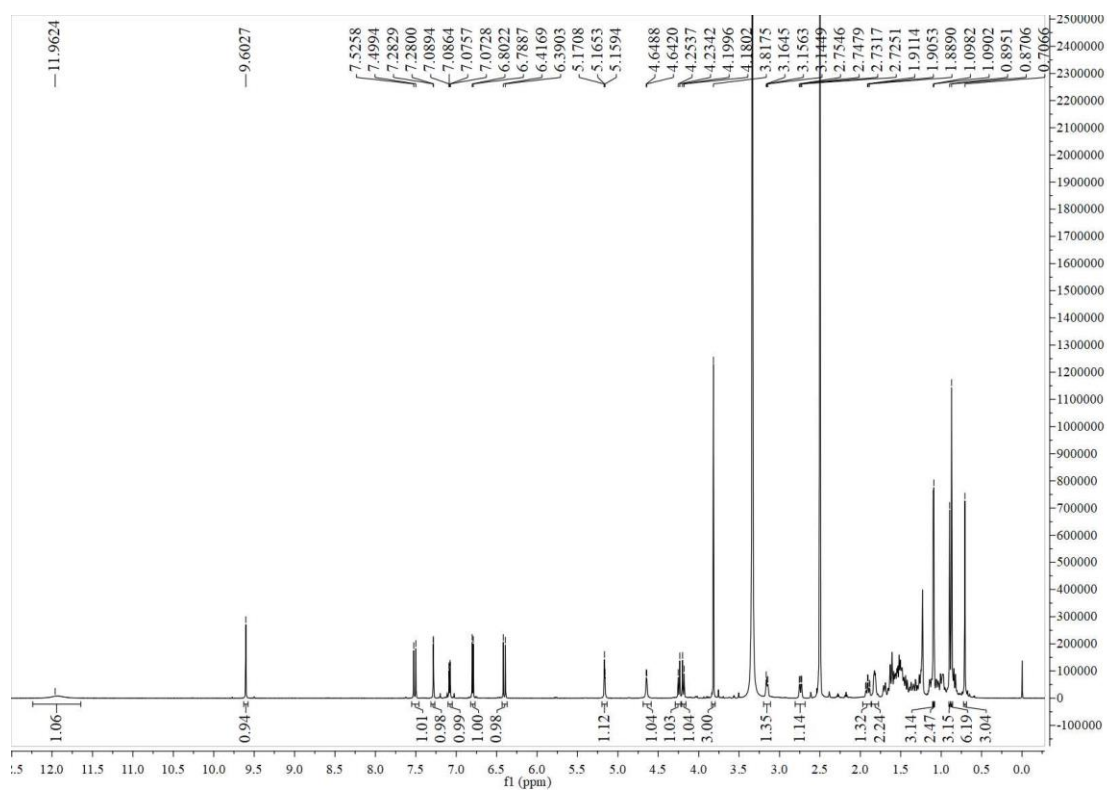

Figure S57 The <sup>1</sup>H-NMR spectrum of compound 11.

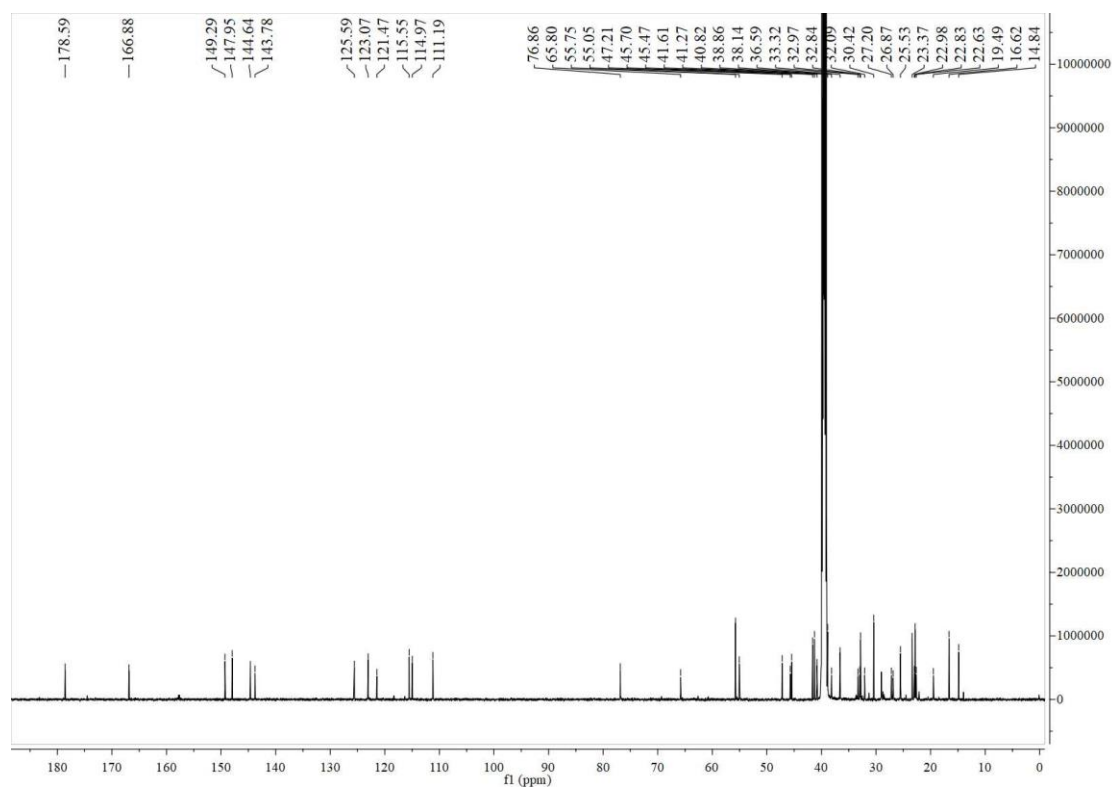

Figure S58 The <sup>13</sup>C-NMR spectrum of compound 11.



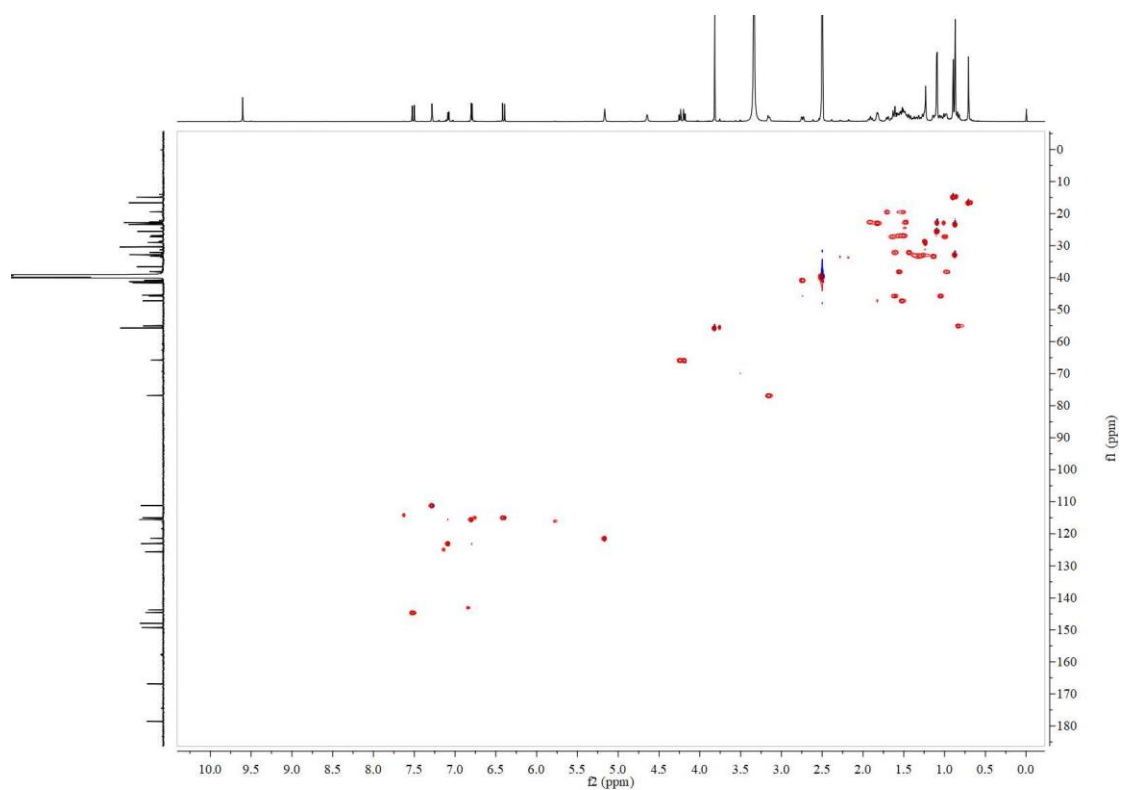

Figure S59 The HSQC spectrum of compound **11**.

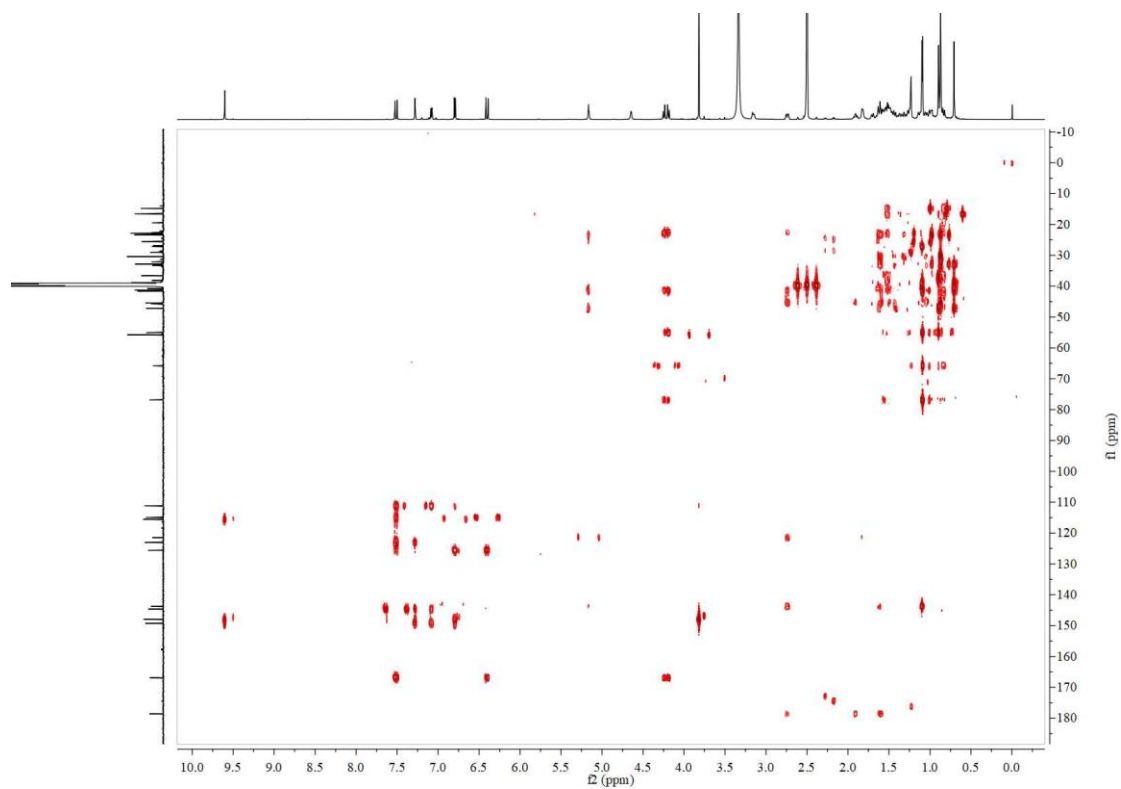

Figure S60 The HMBC spectrum of compound **11**.

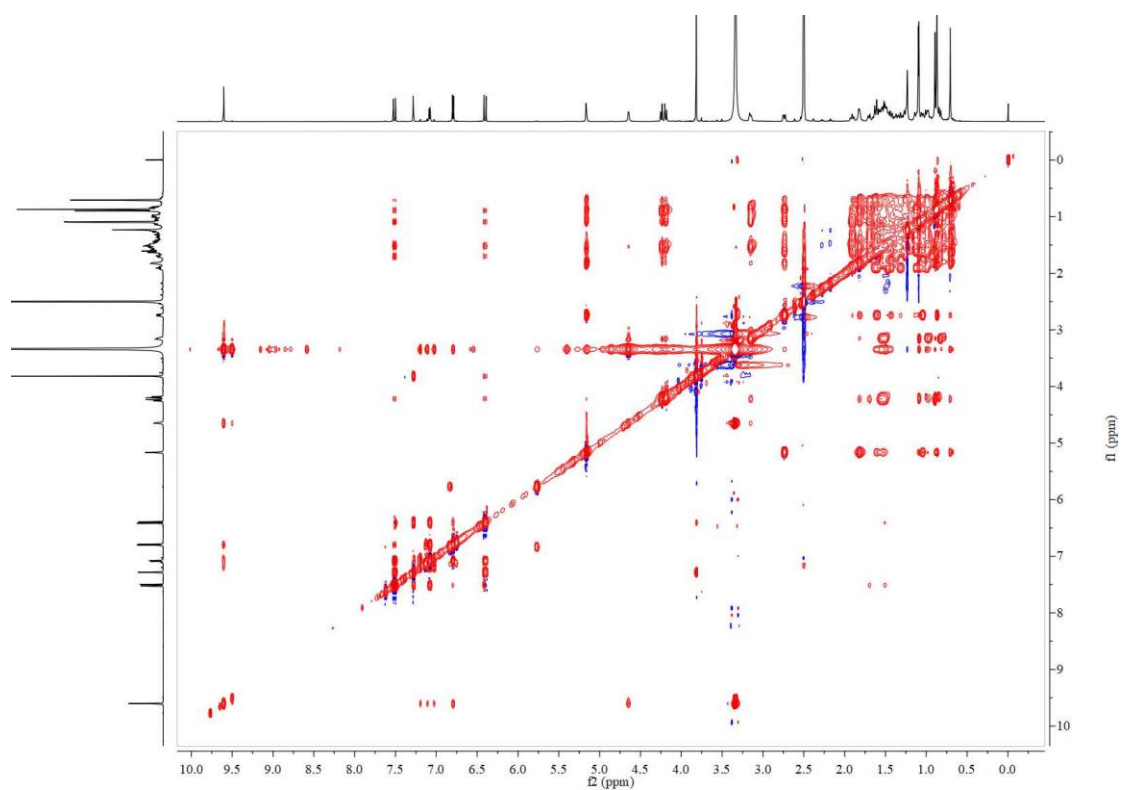

Figure S61 The NOESY spectrum of compound **11**.
